# Supplementary material for: Before the lecture begins: unpacking how affective measures impact performance in general chemistry 1
Source: Royal Society of Chemistry journal article supplement (doi:10.1039/d5rp00295h), 2025-10-23
Supplement: d5rp00295h1.pdf [file d5rp00295h1.pdf]

Electronic Supplementary Information (ESI)

**Title:** Before the Lecture Begins: Unpacking How Affective Measures Impact performance in  
General Chemistry 1

Vanessa P. Bustamante and Regina F. Frey\*

Table of Contents

- A. [Internal Structure](#)
  - I. [Academic Mindset](#)
  - II. [Imposter Syndrome](#)
  - III. [Social Belonging](#)
  - IV. [Childhood Science Currency](#)
  - V. [Removal of Outliers](#)
- B. [SEM Path Models](#)
  - I. [Main text model fits with FDR corrections and bootstrapped results](#)
  - II. [Additional Models tested \(not included in the main text\)](#)
- C. [Mediation Analysis](#)

## A: Internal Structure

### ***Descriptive statistics and determination of sampling adequacy***

The investigation of data distributions enables early detection of non-normal properties that may affect correlations and subsequent analyses. In this study, data normality and variability were assessed using descriptive statistics, including histograms, means, standard deviations, skewness, and kurtosis. Data for Science Currency (SciCur) were collected only at the start of the semester, as this construct pertains to students science resources as a child and their parental influence. In contrast, data for social belonging, imposter syndrome, and academic mindset were collected at two time points: early semester (first two weeks) and end of semester (last two weeks, prior to finals). Because the social belonging instrument had been previously used at the same institution and course, only confirmatory factor analysis (CFA) was conducted to confirm its internal structure. For Academic Mindset and Imposter Syndrome, however, both exploratory and confirmatory factor analyses (EFA and CFA) were performed.

The full, early-semester (pr\_) dataset (N = 398) was randomly split in half: one subgroup (G1) was used for exploratory factor analysis (EFA), while the other (G2) was reserved for CFA. For each construct, we created a testing and training dataset. Further details for each construct are described below. Descriptive statistics (not-reverse scored/coded to show true distribution) were calculated for G1, followed by assumption checks to determine suitability for factor analysis. For multidimensional models that include both positive and negative phrasing of survey questions—such as academic mindset and social belonging, it is recommended that negatively worded items (academic mindset entity and social belonging: belonging uncertainty) be reverse scored/coded to avoid additional problems with skewness (Streiner and Kottner, 2014; Komperda, *et al.*, 2018). Multivariate normality was examined using Mardia's test ( $p < .05$  indicating deviation from normality). Due to violations of multivariate normality detected by Mardia's test across all measures, Polychoric correlations were used for the EFAs. The Polychoric correlation matrix was examined to ensure that a substantial number of correlations exceeded .30, indicating sufficient intercorrelation among items to justify factor analysis (Watkins, 2018). Specifically, sampling adequacy was evaluated using the Kaiser-Meyer-Olkin (KMO) measure ( $KMO > 0.80$ ), and factorability was assessed with Bartlett's test of sphericity ( $p < .001$ ). Multicollinearity was assessed for measures with more than one factor via Variance Inflation Factors ( $VIFs < 10.0$ ), and potential outliers were identified using Mahalanobis  $D^2$ , with significance determined by the chi-square distribution based on the number of items per measure ( $p < .001$ ). If the measure does not include values excluded due to Mahalanobis  $D^2$ , then outliers were not excluded. Below, we present our descriptive statistics, assumption checks, EFAs, and CFAs for each measure used in this study.

### ***EFA and Estimation Methods***

EFA is a multivariate technique for uncovering the underlying structure of relationships among a set of observed variables (items) by identifying their common underlying dimensions (Beaujean, 2014; Hair, *et al.*, 2019). This method does not rely on prior assumptions about the factor structure; factors (latent variables) are extracted from a dataset without pre-specifying the number of factors or the pattern of factor loadings between the observed and latent factors. To

identify the appropriate number of factors to retain for rotation, two post-estimations were conducted: minimum average partial (MAP) (Velicer, 1976) and scree plots (Cattell, 1978). For extraction method, Minimum Residual (MinRes) was chosen. Oblique rotation was chosen because it allows the factors to be correlated, which more accurately reflects the reality that social science variables are often interrelated (Meehl, 1990). Promax, an oblique rotation method, was selected as the extraction method because it allows factors to be correlated (Finch, 2020). Due to oblique rotation, close attention was paid to both the pattern coefficients (to interpret the meaning of each factor) and the factor intercorrelations (to understand how much the factors overlap (Bandalos and Gerstner, 2016; Bandalos, 2018). To ensure both practical (10% variance explained) and statistical ( $p < .05$ ) significance of eigen loadings, the threshold for salience was originally set at 0.32 (Morin, *et al.*, 2020). Factor models were checked to ensure that the proportion (no more than 20% of data) of residual coefficients did not exceed absolute values of .05 and .10 (Flora and Flake, 2017). Close model fit, meaning the ability of a model to reproduce the data, was indicated by an RMSR value of 0.05 or smaller.

### ***CFA Guidelines***

CFA is a theory-driven statistical method used to test hypotheses about the relationships between observed variables (items) and their underlying latent constructs (factors). This method involves specifying a predefined measurement model, estimating the covariance matrix implied by this model, and comparing it to the observed covariance matrix to evaluate how well the model fits the data.

### ***Goodness-of-fit Satorra Bentler***

Due to the multivariate non-normality distribution of our data, a Satorra-Bentler scaled chi-squared test for model goodness of fit was selected, which is robust to non-normality (Satorra and Bentler, 1994). The chi-square goodness of fit statistic evaluates the size of the difference between the sample and fitted covariance matrices (Hu and Bentler, 1999). For good model fit, Schreiber *et al.* (2006) recommended a non-significant chi-square p-value.

### ***RMSEA***

The Root Mean Square Error of Approximation (RMSEA) is an index to evaluate a “badness of fit,” where zero indicates a perfect fit and higher values indicate a lack of fit (Browne and Cudeck, 1993; Watkins, 2021). Hu and Bentler (1999) recommended RMSEA values  $< .06$  to  $.08$ .

### ***CFI***

The Comparative Fit Index (CFI) represents the amount of variance that has been accounted for in a covariance matrix (Watkins, 2021). Higher CFI values indicate a better model fit. Hu and Bentler recommend a CFI index bigger than or equal to 0.95 for a good model fit; whereas, a CFI index  $> 0.90$  is an adequate model fit (Hu and Bentler, 1999; Sivo, *et al.*, 2006).

### ***TLI***

The Tucker-Lewis Index (TLI) (Tucker and Lewis, 1973), also known as the non-normed fit index (NNFI) (Bentler and Bonett, 1980), is an incremental fit index that measures the proportionate improvement of fit by comparing models to a more restricted, hypothetical baseline model

(Woods and Edwards, 2007). Hu and Bentler recommend a TLI index bigger than or equal to 0.95 for a good model fit; whereas, a TLI index > 0.90 is an adequate model fit (Hu and Bentler, 1999; Sivo, *et al.*, 2006)

#### SRMR

The Standardized Root Mean Square Residual is an absolute measure of fit and is the square root of the discrepancy between the sample covariance matrix and the model covariance matrix. Hu and Bentler (1999) recommend an SRMR value of < 0.08.

### References

- Bandalos D. L., (2018), *Measurement theory and applications for the social sciences*, New York: Guilford Publications.
- Bandalos D. L. and Gerstner J. J., (2016), Using factor analysis in test construction.
- Beaujean A. A., (2014), *Latent variable modeling using R: A step-by-step guide*, New York: Routledge.
- Bentler P. M. and Bonett D. G., (1980), Significance tests and goodness of fit in the analysis of covariance structures, *Psychological bulletin*, **88**, 588.
- Browne M. W. and Cudeck R., (1993), Alternative ways of assessing model fit, *Sociological methods & research*, **21**, 230-258.
- Cattell R., (1978), *The scientific use of factor analysis in behavioral and life sciences*, New York: Springer Science & Business Media.
- Finch W. H., (2020), *Exploratory factor analysis*, Thousand Oaks, California: Sage Publications.
- Flora D. B. and Flake J. K., (2017), The purpose and practice of exploratory and confirmatory factor analysis in psychological research: Decisions for scale development and validation, *Canadian Journal of Behavioural Science/Revue canadienne des sciences du comportement*, **49**, 78.
- Hair J. F., Black W. C., Babin B. J. and Anderson R. E., (2019), Multivariate data analysis, *Journal*.
- Hu L. t. and Bentler P. M., (1999), Cutoff criteria for fit indexes in covariance structure analysis: Conventional criteria versus new alternatives, *Structural equation modeling: a multidisciplinary journal*, **6**, 1-55.
- Komperda R., Pentecost T. C. and Barbera J., (2018), Moving beyond alpha: A primer on alternative sources of single-administration reliability evidence for quantitative chemistry education research, *Journal of Chemical Education*, **95**, 1477-1491.
- Meehl P. E., (1990), Why summaries of research on psychological theories are often uninterpretable, *Psychological Reports*, **66**, 195-244.
- Morin A. J., Myers N. D. and Lee S., (2020), Modern factor analytic techniques: Bifactor models, exploratory structural equation modeling (ESEM), and bifactor-ESEM, *Handbook of sport psychology*, 1044-1073.

- Satorra A. and Bentler P. M., (1994), Latent Variables Analysis: Applications for Developmental Research, **171**, 399.
- Sivo S. A., Fan X., Witta E. L. and Willse J. T., (2006), The search for "optimal" cutoff properties: Fit index criteria in structural equation modeling, *The journal of experimental education*, **74**, 267-288.
- Streiner D. L. and Kottner J., (2014), Recommendations for reporting the results of studies of instrument and scale development and testing, *Journal of advanced nursing*, **70**, 1970-1979.
- Tucker L. R. and Lewis C., (1973), A reliability coefficient for maximum likelihood factor analysis, *Psychometrika*, **38**, 1-10.
- Velicer W. F., (1976), Determining the number of components from the matrix of partial correlations, *Psychometrika*, **41**, 321-327.
- Watkins M. W., (2018), Exploratory factor analysis: A guide to best practice, *Journal of black psychology*, **44**, 219-246.
- Watkins M. W., (2021), *A step-by-step guide to exploratory factor analysis with SPSS*, New York, New York: Routledge.
- Woods C. M. and Edwards M. C., (2007), 12 Factor analysis and related methods, *Handbook of statistics*, **27**, 367-394.

## I. Academic Mindset

Prompt: Using a 6-point Likert-Scale where (1) “Strongly Disagree” (2) “Disagree” (3) “Somewhat Disagree” (4) “Somewhat Agree” (5) “Agree” (6) “Strongly Agree.” rate your agreement to the following questions.

### Self-theory Incremental: (4 questions total)

1. With enough time and effort, I think I could significantly improve my intelligence level in chemistry.
2. I believe I can always substantially improve my intelligence in chemistry.
3. Regardless of my current chemistry intelligence level, I think I have the capacity to change it quite a bit.
4. I believe I have the ability to change my basic intelligence level in chemistry considerably over time.

### Self-Theory Entity: (4 questions total)

1. I don't think I personally can do much to increase my chemistry intelligence.
2. My chemistry intelligence is something about me that I personally can't change very much.
3. To be honest, I don't think I can really change how intelligent I am in chemistry.
4. I can learn new things, but I don't have the ability to change my basic intelligence in chemistry.

### Academic Mindset: Incremental Histograms

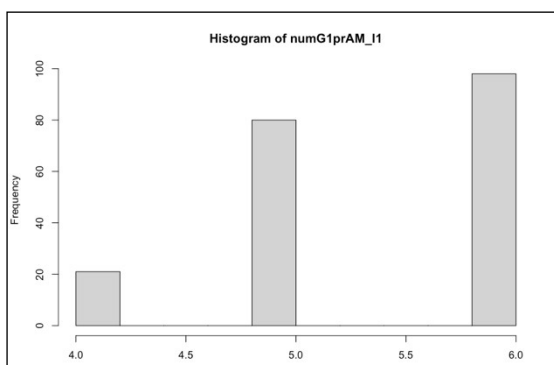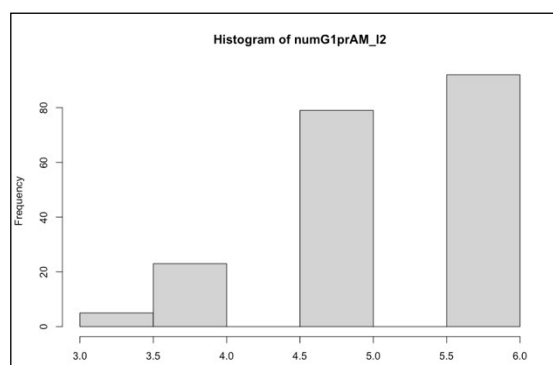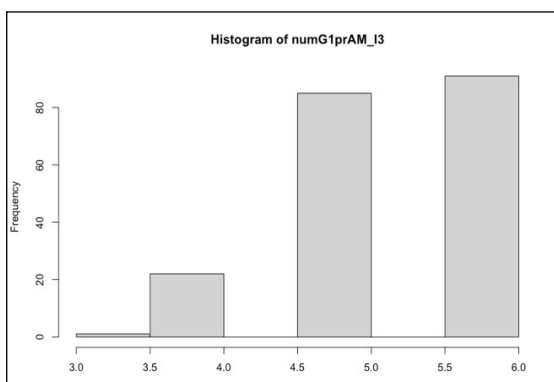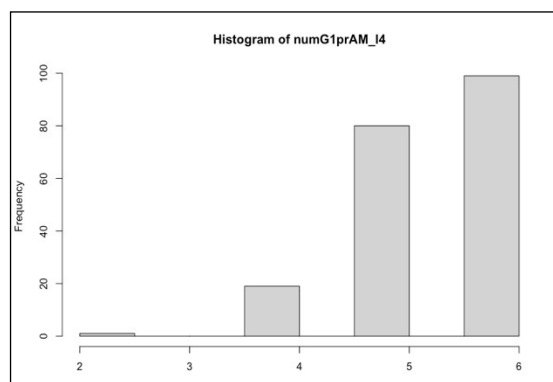

## **Academic Mindset: Entity Histograms**

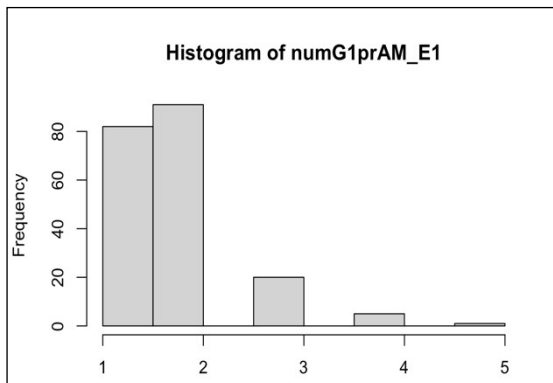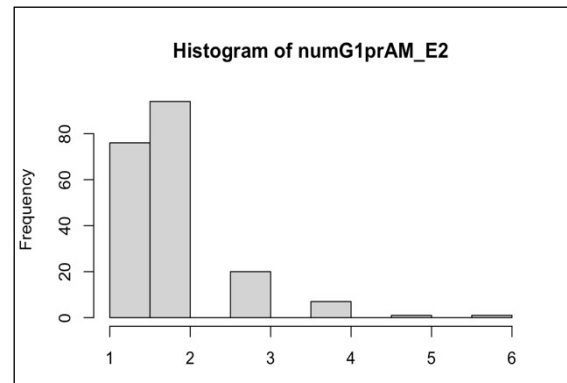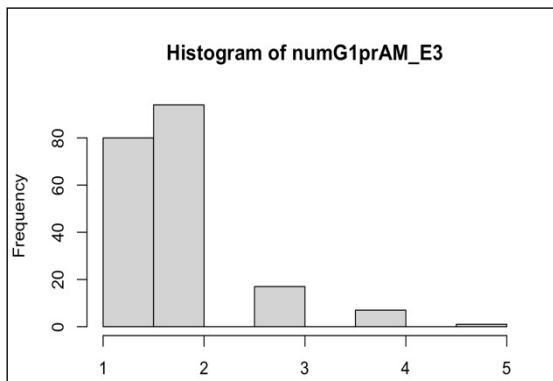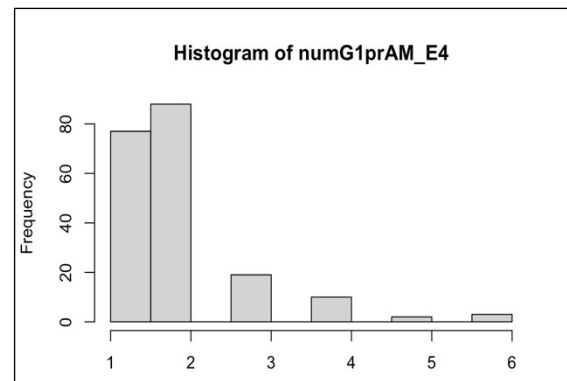

## **G1-Skewness, Kurtosis, SD, and Means for pr Academic Mindset (8 items, outliers NOT removed). Entity items are not reverse coded.**

|            | Skewness   | Kurtosis | Mean     | SD        |
|------------|------------|----------|----------|-----------|
| G1-item I1 | -0.6375602 | 2.334194 | 5.386935 | 0.6712194 |
| G1-item I2 | -0.8937528 | 3.274324 | 5.296482 | 0.7703716 |
| G1-item I3 | -0.6453332 | 2.649527 | 5.336683 | 0.690638  |
| G1-item I4 | -1.050449  | 4.584285 | 5.386935 | 0.7006708 |
| G1-item E1 | 1.042203   | 4.408739 | 1.753769 | 0.7750356 |
| G1-item E2 | 1.383645   | 6.203767 | 1.824121 | 0.8493736 |
| G1-item E3 | 1.111957   | 4.57311  | 1.824121 | 0.7893446 |
| G1-item E4 | 1.638515   | 6.497605 | 1.899497 | 1.005013  |

### Mardia's Test of Academic Mindset (Incremental and Entity ; Entity Items are Reverse Coded)

```
Call: mardia(x = G1NumAllprAM)

Mardia tests of multivariate skew and kurtosis
Use describe(x) the to get univariate tests
n.obs = 199  num.vars = 8
b1p = 62.01  skew = 2056.72  with probability <= 0
  small sample skew = 2094.71  with probability <= 0
b2p = 205.35  kurtosis = 69.9  with probability <= 0
```

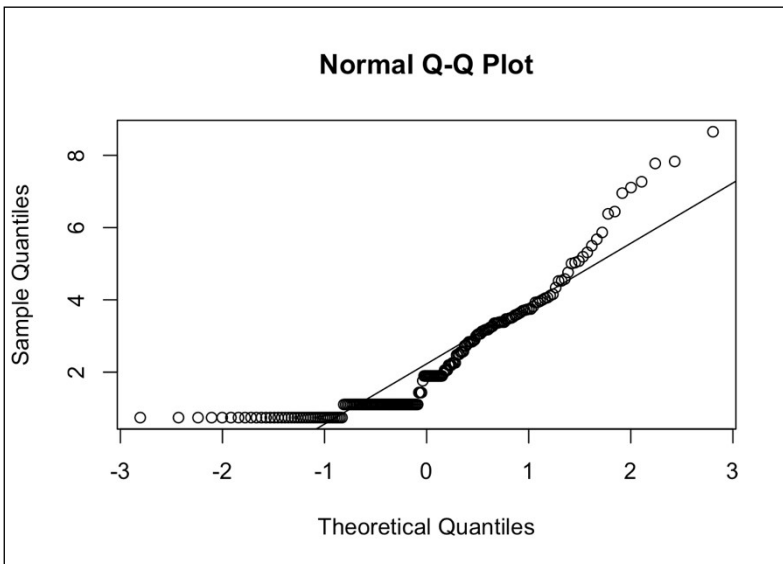

Mardia's test of multivariate skewness ( $b1p = 62.01$ ,  $p < .001$ ) and kurtosis ( $b2p = 205.35$ ,  $p < .001$ ; kurtosis = 69.9) indicated significant departures from multivariate normality for the 8 variables in the sample ( $n = 199$ ). These results suggest the data do not meet the assumption of multivariate normality.



## Polychoric Correlation Matrix

|              | E1       | E2       | E3       | E4       | I1       | I2       | I3       | I4 |
|--------------|----------|----------|----------|----------|----------|----------|----------|----|
| numG1prAM_E1 | 1        |          |          |          |          |          |          |    |
| numG1prAM_E2 | 0.839189 | 1        |          |          |          |          |          |    |
| numG1prAM_E3 | 0.855882 | 0.910815 | 1        |          |          |          |          |    |
| numG1prAM_E4 | 0.694275 | 0.701001 | 0.747273 | 1        |          |          |          |    |
| numG1prAM_I1 | 0.689688 | 0.57101  | 0.631057 | 0.555983 | 1        |          |          |    |
| numG1prAM_I2 | 0.697624 | 0.59142  | 0.625921 | 0.541888 | 0.861182 | 1        |          |    |
| numG1prAM_I3 | 0.702965 | 0.604536 | 0.662522 | 0.540387 | 0.839722 | 0.836635 | 1        |    |
| numG1prAM_I4 | 0.604896 | 0.521549 | 0.558873 | 0.525441 | 0.775407 | 0.778201 | 0.835736 | 1  |

## Kaiser-Myer Olkin Test (KMO)

```
> kmo_G1prAM <- kmo_optimal_solution(G1NumAllprAM, squared = FALSE)
Final Solution Achieved!> kmo_G1prAM[["results"]]
$overall
[1] 0.9054591

$individual
      MSA
numG1prAM_E1 0.9508088
numG1prAM_E2 0.8625234
numG1prAM_E3 0.8556312
numG1prAM_E4 0.9501328
numG1prAM_I1 0.9134098
numG1prAM_I2 0.9161016
numG1prAM_I3 0.9007254
numG1prAM_I4 0.9115451

$AIS
      [,1]      [,2]      [,3]      [,4]      [,5]      [,6]      [,7]
[1,] 0.19988138 -0.050482483 -0.03942762 -0.0277544898 -0.02027463 -0.0264753640 -0.016737919
[2,] -0.05048248 0.152936552 -0.08965293 -0.0092031741 0.02013869 -0.0118447182 0.009696078
[3,] -0.03942762 -0.089652929 0.12383150 -0.0652585775 -0.01074994 0.0120847967 -0.024767901
[4,] -0.02775449 -0.009203174 -0.06525858 0.4114384243 -0.02092791 0.0004787711 0.034390111
[5,] -0.02027463 0.020138692 -0.01074994 -0.0209279070 0.19967961 -0.0933310195 -0.049723804
[6,] -0.02647536 -0.011844718 0.01208480 0.0004787711 -0.09333102 0.2009515090 -0.044710892
[7,] -0.01673792 0.009696078 -0.02476790 0.0343901113 -0.04972380 -0.0447108924 0.175899311
[8,] 0.01108034 -0.008238082 0.01661960 -0.0533561234 -0.02936405 -0.0368983472 -0.102702900

      [,8]
[1,] 0.011080340
[2,] -0.008238082
[3,] 0.016619598
[4,] -0.053356123
[5,] -0.029364051
[6,] -0.036898347
[7,] -0.102702900
[8,] 0.267421193

$AIR
      [,1]      [,2]      [,3]      [,4]      [,5]      [,6]      [,7]      [,8]
[1,] 0.95080879 -0.28873464 -0.25061027 -0.09678201 -0.10148454 -0.13210223 -0.08926541 0.04792576
[2,] -0.28873464 0.86252342 -0.65146827 -0.03668847 0.11524146 -0.06756526 0.05911645 -0.04073545
[3,] -0.25061027 -0.65146827 0.85563124 -0.28911433 -0.06836338 0.07660871 -0.16781917 0.09132865
[4,] -0.09678201 -0.03668847 -0.28911433 0.95013283 -0.07301406 0.00166506 0.12783480 -0.16085477
```

## Barlett's Test of Sphericity

```
> cortest.bartlett(G1NumAllprAM_SpearMatrix, n=199)
$chisq
[1] 1934.882

$p.value
[1] 0

$df
[1] 28

>
> format(result$p.value, scientific = TRUE)
[1] "0e+00"
```

## Check for Multicollinearity Using VIFs

| numG1prAM_I1 | numG1prAM_I2 | numG1prAM_I3 | numG1prAM_I4 |
|--------------|--------------|--------------|--------------|
| 4.822204     | 4.779815     | 5.199445     | 3.624004     |

## Minimum Average Partial (MAP) test

```
> vss_result <- vss(G1NumAllAM, n.obs = nrow(G1NumAllAM), rotate = "varimax", fm = "minres")
> # View the results
> print(vss_result)
```

Very Simple Structure  
Call: vss(x = G1NumAllAM, rotate = "varimax", fm = "minres", n.obs = nrow(G1NumAllAM))  
VSS complexity 1 achieves a maximum of 0.92 with 1 factors  
VSS complexity 2 achieves a maximum of 1 with 3 factors

The Velicer MAP achieves a minimum of 0.05 with 2 factors  
BIC achieves a minimum of -49.34 with 2 factors  
Sample Size adjusted BIC achieves a minimum of -8.16 with 2 factors

Statistics by number of factors

|   | vss1 | vss2 | map   | dof | chisq   | prob     | sqresid | fit  | RMSEA | BIC | SABIC | complex | eChisq  | SRMR    | eCRMS  | eBIC |
|---|------|------|-------|-----|---------|----------|---------|------|-------|-----|-------|---------|---------|---------|--------|------|
| 1 | 0.92 | 0.00 | 0.460 | 20  | 1.0e+03 | 4.6e-203 | 2.865   | 0.92 | 0.501 | 913 | 975.9 | 1.0     | 4.0e+02 | 1.9e-01 | 0.2240 | 293  |
| 2 | 0.75 | 1.00 | 0.054 | 13  | 1.9e+01 | 1.1e-01  | 0.100   | 1.00 | 0.050 | -49 | -8.2  | 1.2     | 4.1e-01 | 6.1e-03 | 0.0089 | -68  |
| 3 | 0.75 | 1.00 | 0.104 | 7   | 7.1e+00 | 4.1e-01  | 0.081   | 1.00 | 0.009 | -30 | -7.7  | 1.2     | 1.5e-01 | 3.7e-03 | 0.0074 | -37  |
| 4 | 0.75 | 0.96 | 0.165 | 2   | 3.8e-01 | 8.3e-01  | 0.064   | 1.00 | 0.000 | -10 | -3.9  | 1.3     | 6.2e-03 | 7.5e-04 | 0.0028 | -11  |
| 5 | 0.75 | 1.00 | 0.257 | -2  | 2.9e-05 | NA       | 0.065   | 1.00 | NA    | NA  | NA    | 1.2     | 4.7e-07 | 6.5e-06 | NA     | NA   |
| 6 | 0.75 | 1.00 | 0.432 | -5  | 1.5e-07 | NA       | 0.065   | 1.00 | NA    | NA  | NA    | 1.2     | 2.7e-09 | 4.9e-07 | NA     | NA   |
| 7 | 0.75 | 1.00 | 1.000 | -7  | 0.0e+00 | NA       | 0.064   | 1.00 | NA    | NA  | NA    | 1.2     | 1.2e-15 | 3.3e-10 | NA     | NA   |
| 8 | 0.75 | 1.00 | NA    | -8  | 0.0e+00 | NA       | 0.064   | 1.00 | NA    | NA  | NA    | 1.2     | 1.2e-15 | 3.3e-10 | NA     | NA   |

**Scree Plot–red line signifies the Kaiser criterion reference line**

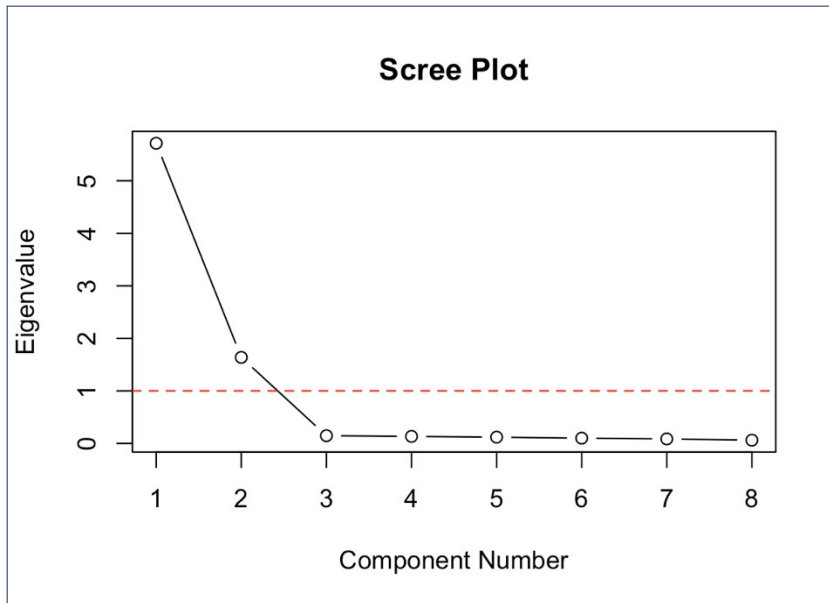

**Residuals for pr\_AM:**

|              | E1       | E2       | E3       | E4       | I1       | I2       | I3       | I4 |
|--------------|----------|----------|----------|----------|----------|----------|----------|----|
| numG1prAM_E1 |          |          |          |          |          |          |          |    |
| numG1prAM_E2 | 0.007636 |          |          |          |          |          |          |    |
| numG1prAM_E3 | -0.01022 | 0.000336 |          |          |          |          |          |    |
| numG1prAM_E4 | 0.001549 | -0.00891 | 0.010085 |          |          |          |          |    |
| numG1prAM_I1 | 0.006176 | -0.01143 | 0.001216 | 0.006557 |          |          |          |    |
| numG1prAM_I2 | 0.011557 | 0.005171 | -0.00762 | -0.00998 | 0.02569  |          |          |    |
| numG1prAM_I3 | 0.001369 | 0.004018 | 0.01381  | -0.02421 | -0.01219 | -0.01438 |          |    |
| numG1prAM_I4 | -0.01879 | 0.001558 | -0.00636 | 0.026828 | -0.01643 | -0.01245 | 0.029734 |    |

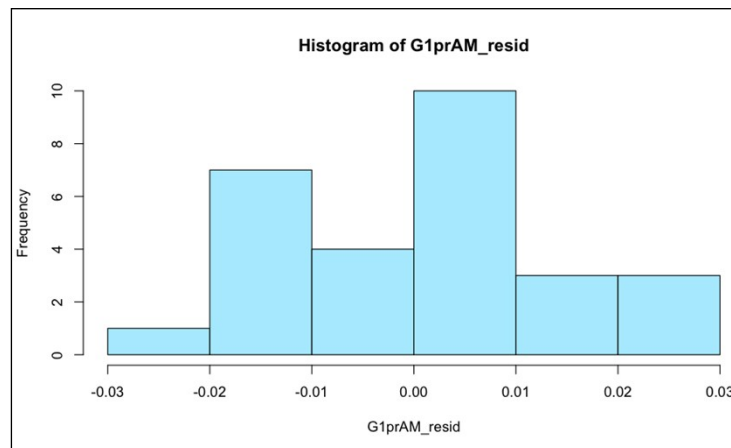

- No residuals are greater than  $|0.05|$
- Residuals are normally distributed

### Exploratory Factor Analysis, *promax rotation*

| Factor Loadings of Exploratory Factor Analysis (EFA) of Early-Semester Academic Mindset |             |             |                  |                   |
|-----------------------------------------------------------------------------------------|-------------|-------------|------------------|-------------------|
| Survey Item                                                                             | Factor 1    | Factor 2    | Uniqueness $u^2$ | Communality $h^2$ |
| G1-item E1                                                                              | <b>0.93</b> | 0.01        | 0.120            | 0.88              |
| G1-item E2                                                                              | <b>0.97</b> | 0.01        | 0.052            | 0.95              |
| G1-item E3                                                                              | <b>0.95</b> | -0.02       | 0.114            | 0.89              |
| G1-item E4                                                                              | <b>0.91</b> | 0.03        | 0.149            | 0.85              |
| G1-item I1                                                                              | -0.05       | <b>0.98</b> | 0.084            | 0.92              |
| G1-item I2                                                                              | -0.02       | <b>0.95</b> | 0.116            | 0.88              |
| G1-item I3                                                                              | 0.08        | <b>0.90</b> | 0.102            | 0.90              |
| G1-item I4                                                                              | 0.04        | <b>0.91</b> | 0.123            | 0.88              |
| $N = 199$ ; ; Factor loadings reported following a promax (oblique) factor rotation.    |             |             |                  |                   |

### Multidimensional Confirmatory Factor Analysis on G2 Data

Estimator: MLM

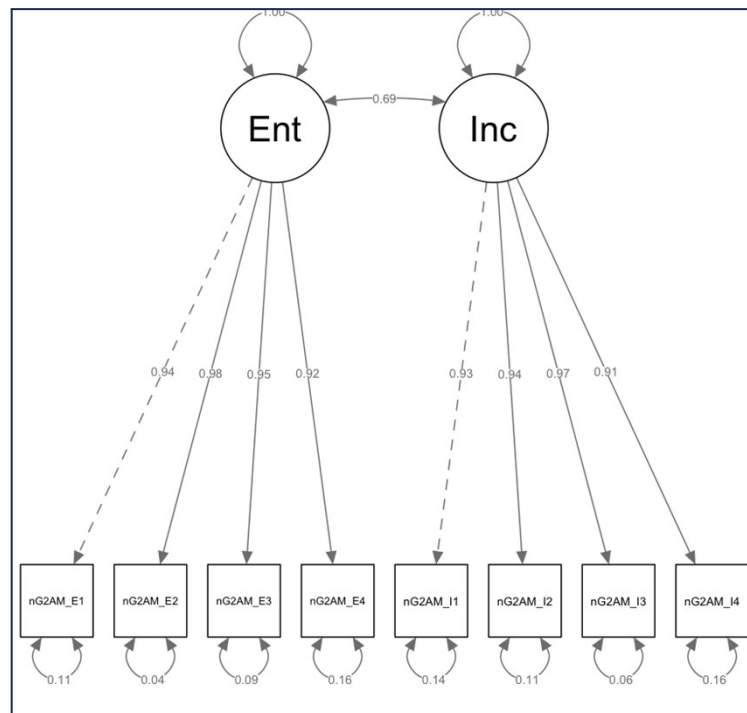

| N   | $\chi^2 (df, p)$   | RMSEA | CFI   | TLI   | SRMR  |
|-----|--------------------|-------|-------|-------|-------|
| 199 | 23.586 (19, 0.213) | 0.062 | 0.994 | 0.991 | 0.023 |

## Unidimensional Confirmatory Factor Analysis on G2 Data

Estimator: MLM

Academic Mindset Entity (4 items loading on one factor)

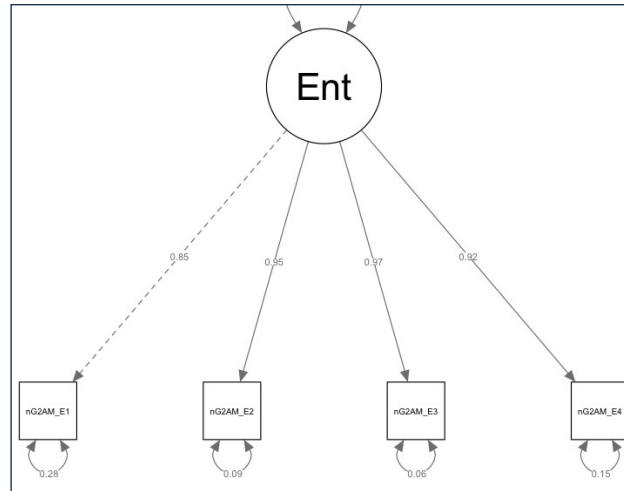

| N   | $\chi^2 (df, p)$ | RMSEA | CFI   | TLI   | SRMR  |
|-----|------------------|-------|-------|-------|-------|
| 199 | 2.628 (2, 0.269) | 0.073 | 0.998 | 0.993 | 0.012 |

Academic Mindset Incremental (4 items loading on one factor)

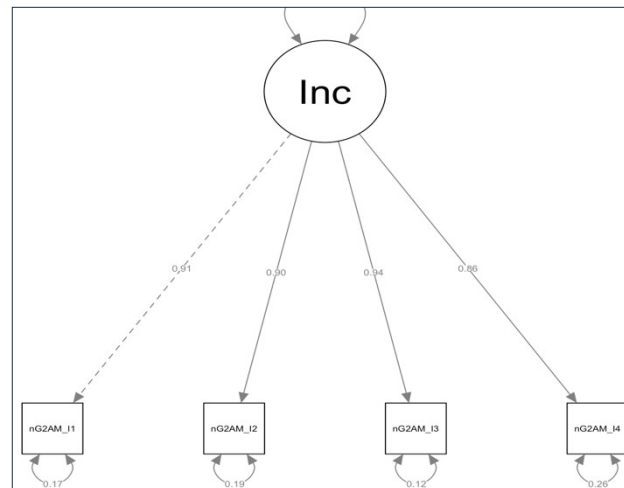

| N   | $\chi^2 (df, p)$ | RMSEA | CFI   | TLI   | SRMR  |
|-----|------------------|-------|-------|-------|-------|
| 199 | 2.910 (2, 0.233) | 0.075 | 0.997 | 0.991 | 0.012 |

## II. Imposter Syndrome

**Prompt:** Using a 6-point Likert-Scale where (1) “Strongly Disagree” (2) “Disagree” (3) “Somewhat Disagree” (4) “Somewhat Agree” (5) “Agree” (6) “Strongly Agree.” rate your agreement to the following questions.

1. In class, I felt like people might find out that I am not as capable as they think I am.
2. Today, I felt like my successes in class were due to some kind of luck.
3. In class, I felt afraid others would discover how much knowledge or ability I really lack.
4. In class, I felt like an "imposter."

### Imposter Syndrome Histograms

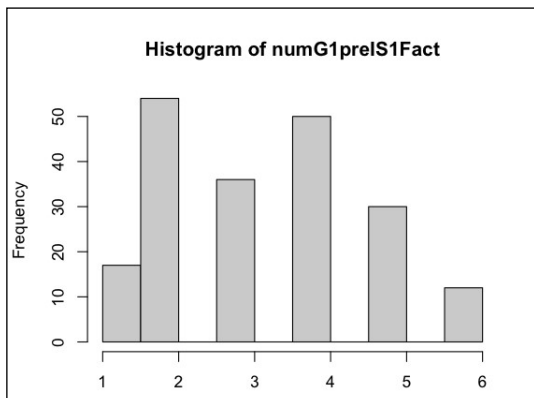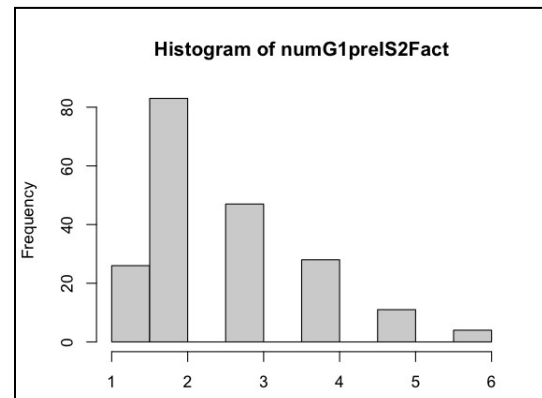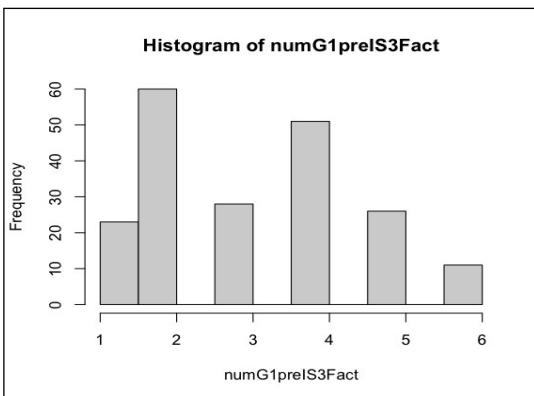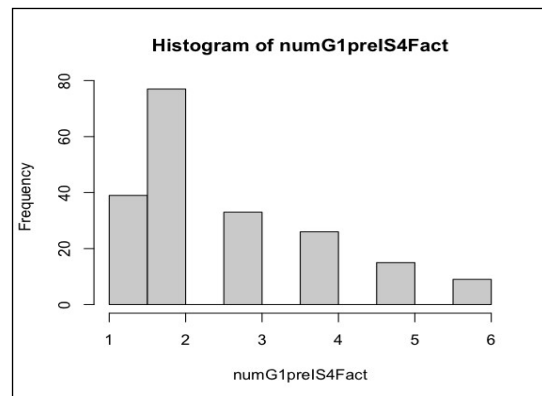

### **G1-Skewness and Kurtosis for pr IS (4 items, outliers NOT removed)**

|             | Skewness  | Kurtosis | Mean     | SD       |
|-------------|-----------|----------|----------|----------|
| G1-item IS1 | 0.1582299 | 2.078994 | 3.291457 | 1.39098  |
| G1-item IS2 | 0.7643049 | 3.197778 | 2.633166 | 1.163895 |
| G1-item IS3 | 0.227524  | 2.040708 | 3.150754 | 1.423961 |
| G1-item IS4 | 0.8101957 | 2.846062 | 2.638191 | 1.374276 |

### **Mardia's Test**

```

Call: mardia(x = G1NumAll_prIS)

Mardia tests of multivariate skew and kurtosis
Use describe(x) the to get univariate tests
n.obs = 199    num.vars = 4
b1p = 3.15    skew = 104.34 with probability <= 2.1e-13
small sample skew = 106.56 with probability <= 8.3e-14
b2p = 27.77    kurtosis = 3.84 with probability <= 0.00012

```

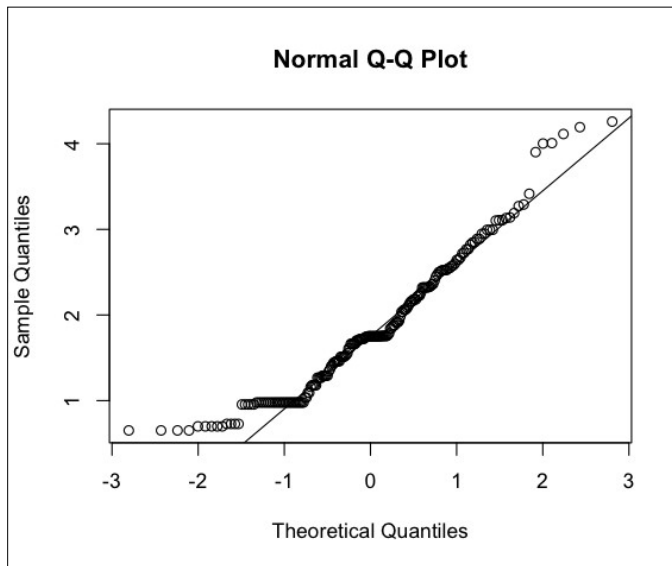

Mardia's test indicated significant multivariate skewness ( $b1p = 3.15$ , skew = 104.34,  $p < .001$ ) and kurtosis ( $b2p = 27.77$ , kurtosis = 3.84,  $p = .00012$ ) for the set of 4 variables ( $n = 199$ ). These results suggest the data deviate significantly from multivariate normality.

### Polychoric Correlation Matrix

|             | IS1      | IS2      | IS3      | IS4      |
|-------------|----------|----------|----------|----------|
| G1-item IS1 | 1        | 0.57487  | 0.834457 | 0.686891 |
| G1-item IS2 | 0.57487  | 1        | 0.62777  | 0.652307 |
| G1-item IS3 | 0.834457 | 0.62777  | 1        | 0.730005 |
| G1-item IS4 | 0.686891 | 0.652307 | 0.730005 | 1        |

### Kaiser-Myer Olkin Test (KMO)

```

> kmo_G1prIS <- kmo_optimal_solution(G1NumAll_prIS, squared = FALSE)
Final Solution Achieved!> kmo_G1prIS[["results"]]
$overall
[1] 0.8032075

$individual
          MSA
numG1preIS1Fact 0.7677055
numG1preIS2Fact 0.8768113
numG1preIS3Fact 0.7494982
numG1preIS4Fact 0.8565618

```

### **Barlett's Test of Sphericity**

```

> BartRes <- cortest.bartlett(G1AllprISEXPMatrix, n=199)
> BartRes
$chisq
[1] 517.5119

$p.value
[1] 1.418467e-108

$df
[1] 6

> format(BartRes$p.value, scientific = TRUE)
[1] "1.418467e-108"

```

### **Minimum Average Partial (MAP) test**

```

> vss_result <- vss(G1NumAll_IS, n.obs = nrow(G1NumAll_IS), rotate = "varimax", fm = "minres")
> print(vss_result)

Very Simple Structure
Call: vss(x = G1NumAll_IS, rotate = "varimax", fm = "minres", n.obs = nrow(G1NumAll_IS))
VSS complexity 1 achieves a maximum of 0.96 with 1 factors
VSS complexity 2 achieves a maximum of 0.96 with 2 factors

The Velicer MAP achieves a minimum of 0.12 with 1 factors
BIC achieves a minimum of -9.14 with 1 factors
Sample Size adjusted BIC achieves a minimum of -2.8 with 1 factors

Statistics by number of factors
  vss1 vss2 map dof  chisq prob sqresid fit RMSEA  BIC SABIC complex eChisq  SRMR eCRMS eBIC
1 0.96 0.00 0.12  2 1.4e+00 0.48  0.43 0.96  0 -9.1 -2.8  1.0 2.2e-01 9.7e-03 0.017 -10
2 0.45 0.96 0.45 -1 3.2e-10 NA  0.37 0.96 NA NA NA  1.8 2.1e-10 3.0e-07 NA NA
3 0.32 0.73 1.00 -3 0.0e+00 NA  0.37 0.96 NA NA NA  2.7 3.8e-21 1.3e-12 NA NA
4 0.32 0.73 NA -4 0.0e+00 NA  0.37 0.96 NA NA NA  2.7 3.8e-21 1.3e-12 NA NA

```

### **Scree Plot—red line signifies the Kaiser criterion reference line**



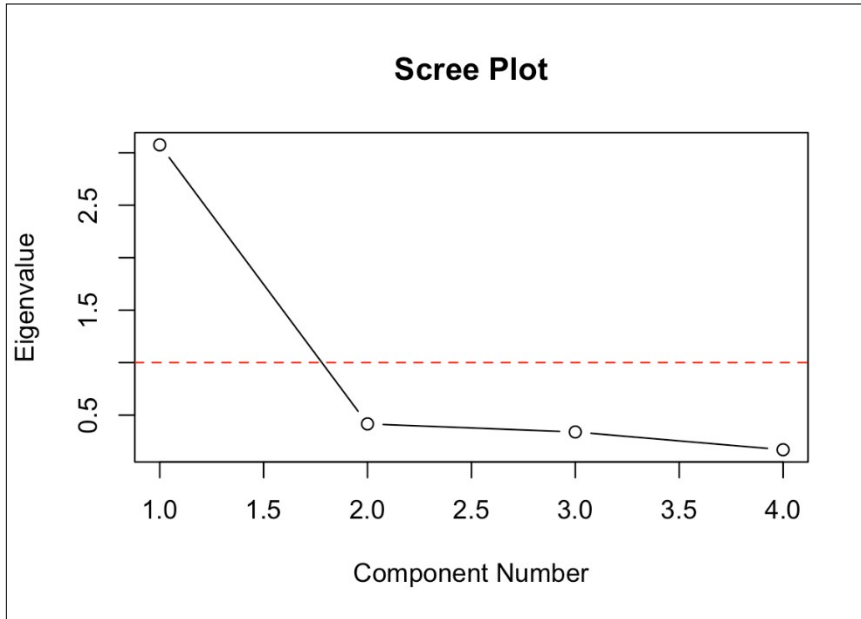

**Residuals for pr\_IS:**

|                 | IS1         | IS2         | IS3         | IS4 |
|-----------------|-------------|-------------|-------------|-----|
| numG1preIS1Fact |             |             |             |     |
| numG1preIS2Fact | -0.03915441 |             |             |     |
| numG1preIS3Fact | 0.04479128  | -0.01870787 |             |     |
| numG1preIS4Fact | -0.01676051 | 0.06175765  | -0.03108526 |     |

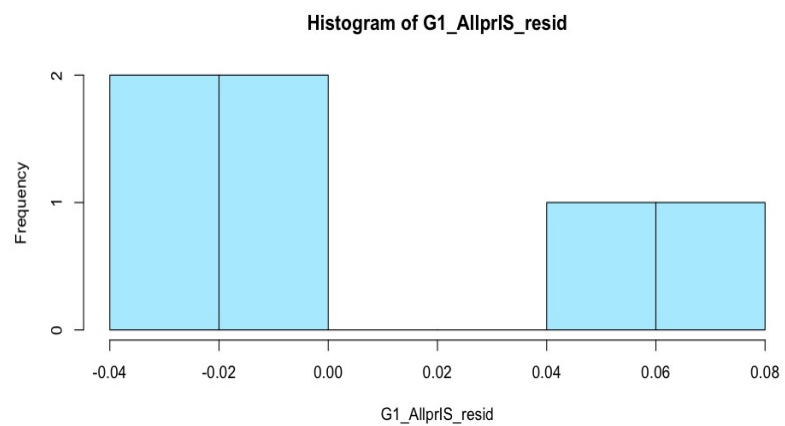

- 1 residual |0.05|
- Residuals are bimodal (not normally distributed)

### Exploratory Factor Analysis

| Factor Loadings of Exploratory Factor Analysis (EFA) of Early-Semester Imposter Syndrome |             |                  |                   |
|------------------------------------------------------------------------------------------|-------------|------------------|-------------------|
| Survey Item                                                                              | Factor 1    | Uniqueness $u^2$ | Communality $h^2$ |
| G1-item IS1                                                                              | <b>0.86</b> | 0.26             | 0.74              |
| G1-item IS2                                                                              | <b>0.69</b> | 0.52             | 0.48              |
| G1-item IS3                                                                              | <b>0.91</b> | 0.17             | 0.83              |
| G1-item IS4                                                                              | <b>0.82</b> | 0.33             | 0.67              |

### Confirmatory Factor Analysis on G2 Data

Estimator: MLM

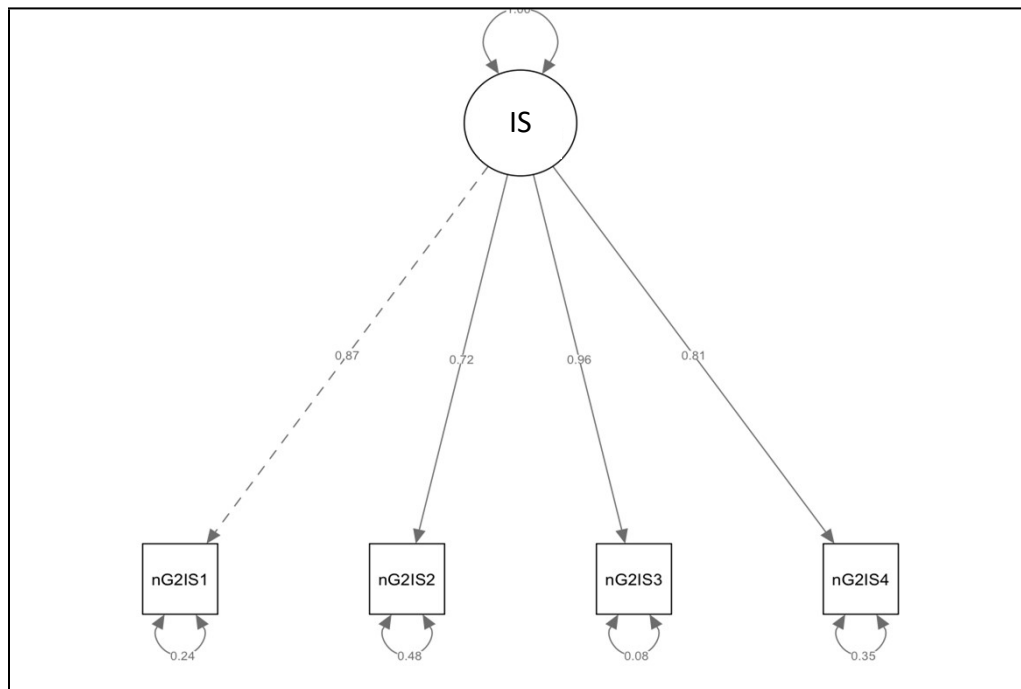

| N   | $\chi^2$ (df, p) | RMSEA | CFI   | TLI   | SRMR  |
|-----|------------------|-------|-------|-------|-------|
| 199 | 2.648 (2, 0.266) | 0.048 | 0.998 | 0.995 | 0.017 |

### III. Social Belonging

Prompt: Using a 6-point Likert-Scale where (1) “Strongly Disagree” (2) “Disagree” (3) “Somewhat Disagree” (4) “Somewhat Agree” (5) “Agree” (6) “Strongly Agree.” rate your agreement to the following questions:

#### Factor 1: Social Belonging (4 items)

1. In (Course name), I feel like I fit in.
2. In (Course name), I feel comfortable with my peers and classmates.
3. In (Course name), I feel comfortable with my instructor.
4. In (Course name), setting aside my performance in class, I feel like belong.

#### Factor 2: Belonging Uncertainty (2 items)

5. In (Course name), I feel uncertain about my belonging (i.e., sometimes I feel like I belong, and sometimes I don't)
6. In (Course name), when I don't perform well, I feel like maybe I don't belong.

*\*The actual course name in the course catalog was provided to students taking the survey*

#### Social Belonging: Sense of Belonging Histograms

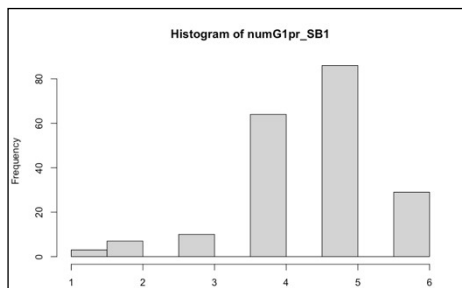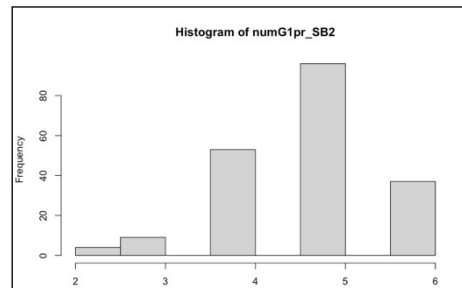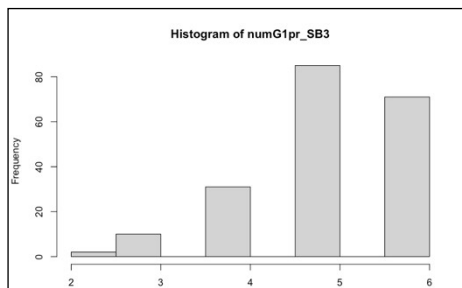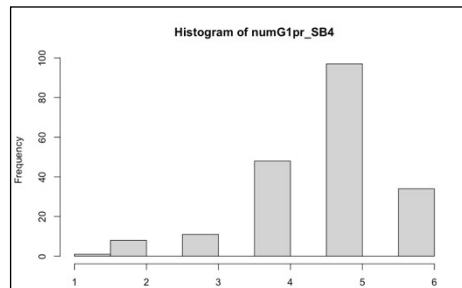

#### Social Belonging: Belonging Uncertainty Histograms

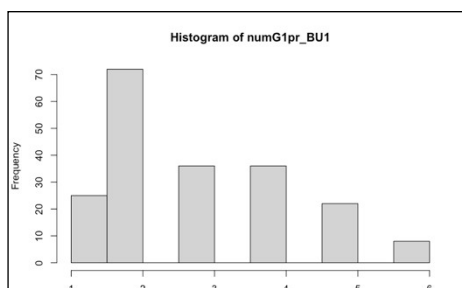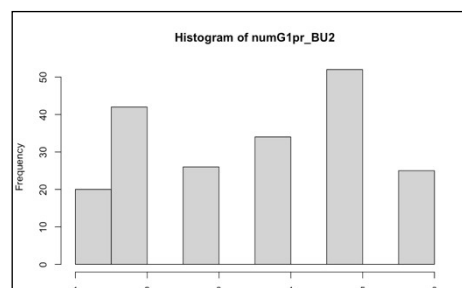

**G1-Skewness and Kurtosis for pr\_SB (8 items, outliers NOT removed). Belonging Uncertainty items are not reverse coded)**

|             | Skewness   | Kurtosis | Mean     | SD        |
|-------------|------------|----------|----------|-----------|
| G1-item SB1 | -0.9928954 | 4.608839 | 4.557789 | 1.017735  |
| G1-item SB2 | -0.6709456 | 3.708735 | 4.768844 | 0.8743449 |
| G1-item SB3 | -0.8978892 | 3.582352 | 5.070352 | 0.8961621 |
| G1-item SB4 | -0.9899429 | 4.239582 | 4.678392 | 0.9883592 |
| G1-item BU1 | 0.5140961  | 2.346084 | 2.909548 | 1.36028   |
| G1-item BU2 | -0.1585015 | 1.765008 | 3.658291 | 1.59349   |

**Mardia's Test of Social Belonging (Belonging Uncertainty Items are Reverse Coded)**

```

Mardia tests of multivariate skew and kurtosis
Use describe(x) the to get univariate tests
n.obs = 199  num.vars = 6
b1p = 8.65  skew = 286.98  with probability <= 9.3e-33
small sample skew = 292.56  with probability <= 9.6e-34
b2p = 64.48  kurtosis = 11.86  with probability <= 0

```

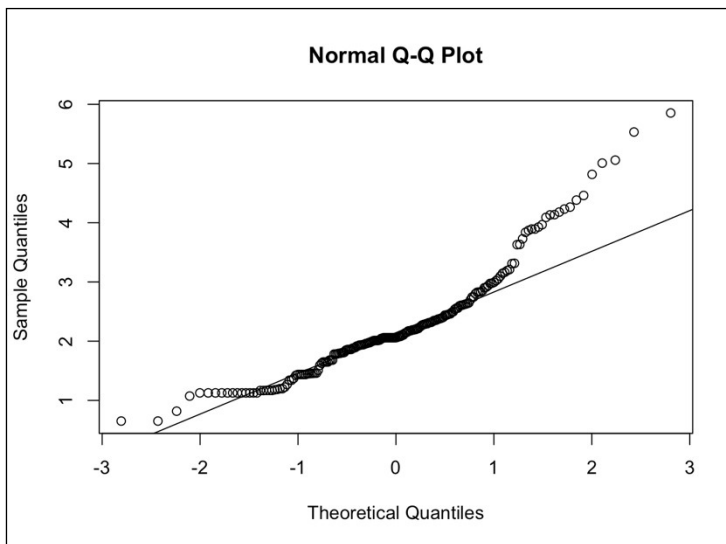

Mardia's test revealed significant multivariate skewness ( $b1p = 8.65$ , skew = 286.98,  $p < .001$ ) and kurtosis ( $b2p = 64.48$ , kurtosis = 11.86,  $p < .001$ ) in the sample of 199 cases with 6 variables, indicating that the data violate the assumption of multivariate normality.

### Polychoric Correlation Matrix

|             | G1-item SB1 | G1-item SB2 | G1-item SB3 | G1-item SB4 | G1-item BU1 | G1-item BU2 |
|-------------|-------------|-------------|-------------|-------------|-------------|-------------|
| G1-item SB1 | 1           | 0.5713034   | 0.4385196   | 0.696397    | -0.3829081  | -0.2680428  |
| G1-item SB2 | 0.5713034   | 1           | 0.4398253   | 0.6733059   | -0.4125862  | -0.2454769  |
| G1-item SB3 | 0.4385196   | 0.4398253   | 1           | 0.4932444   | -0.3469125  | -0.1563792  |
| G1-item SB4 | 0.696397    | 0.6733059   | 0.4932444   | 1           | -0.4575087  | -0.2368835  |
| G1-item BU1 | -0.3829081  | -0.4125862  | -0.3469125  | -0.4575087  | 1           | 0.5099199   |
| G1-item BU2 | -0.2680428  | -0.2454769  | -0.1563792  | -0.2368835  | 0.5099199   | 1           |

### Kaiser-Myer Olkin Test (KMO)

```
> kmo_G1prIS <- kmo_optimal_solution(NumAllG1_prSB, squared = FALSE)
Final Solution Achieved!> kmo_G1prIS[["results"]]
$overall
[1] 0.8029734

$individual
      MSA
numG1pr_SB1 0.8221726
numG1pr_SB2 0.8529301
numG1pr_SB3 0.9059124
numG1pr_SB4 0.7687289
numG1pr_BU1 0.7737911
numG1pr_BU2 0.6765609
```

### Bartlett's Test of Sphericity

```
> BartRes <- corstest.bartlett(G1AllprSBEXPolMatrix, n=199)
> BartRes
$chisq
[1] 434.8098

$p.value
[1] 3.277067e-83

$df
[1] 15

> format(BartRes$p.value, scientific = TRUE)
[1] "3.277067e-83"
```

### Check for Multicollinearity Using VIFs

```
> vif(sense_model)
numG1pr_SB1 numG1pr_SB2 numG1pr_SB3 numG1pr_SB4
2.048225    1.939413    1.380861    2.589168
> vif(uncertainty_model)
numG1pr_BU1 numG1pr_BU2
1.351385    1.351385
```

## Minimum Average Partial (MinAp) Test

```
Call: vss(x = NumAllG1_prSB, rotate = "varimax", fm = "minres", n.obs = nrow(NumAllG1_prSB))
VSS complexity 1 achieves a maximum of 0.81 with 1 factors
VSS complexity 2 achieves a maximum of 0.9 with 2 factors

The Velicer MAP achieves a minimum of 0.07 with 1 factors
BIC achieves a minimum of -17.59 with 2 factors
Sample Size adjusted BIC achieves a minimum of -4.92 with 2 factors

Statistics by number of factors
```

|   | vss1 | vss2 | map   | dof | chisq   | prob    | sqresid | fit  | RMSEA | BIC   | SABIC | complex |
|---|------|------|-------|-----|---------|---------|---------|------|-------|-------|-------|---------|
| 1 | 0.81 | 0.00 | 0.069 | 9   | 4.6e+01 | 4.9e-07 | 2.26    | 0.81 | 0.14  | -1.2  | 27.4  | 1.0     |
| 2 | 0.73 | 0.90 | 0.117 | 4   | 3.6e+00 | 4.7e-01 | 1.19    | 0.90 | 0.00  | -17.6 | -4.9  | 1.2     |
| 3 | 0.69 | 0.83 | 0.256 | 0   | 6.1e-01 | NA      | 0.99    | 0.92 | NA    | NA    | NA    | 1.4     |
| 4 | 0.61 | 0.87 | 0.523 | -3  | 4.4e-10 | NA      | 1.00    | 0.92 | NA    | NA    | NA    | 1.6     |
| 5 | 0.72 | 0.85 | 1.000 | -5  | 0.0e+00 | NA      | 0.98    | 0.92 | NA    | NA    | NA    | 1.5     |
| 6 | 0.72 | 0.85 | NA    | -6  | 0.0e+00 | NA      | 0.98    | 0.92 | NA    | NA    | NA    | 1.5     |

  

|   | eChisq  | SRMR    | eCRMS | eBIC  |
|---|---------|---------|-------|-------|
| 1 | 4.2e+01 | 8.4e-02 | 0.108 | -5.5  |
| 2 | 1.6e+00 | 1.6e-02 | 0.031 | -19.6 |
| 3 | 1.9e-01 | 5.7e-03 | NA    | NA    |
| 4 | 1.4e-10 | 1.6e-07 | NA    | NA    |
| 5 | 1.1e-19 | 4.3e-12 | NA    | NA    |
| 6 | 1.1e-19 | 4.3e-12 | NA    | NA    |

## Scree Plot—red line signifies the Kaiser criterion reference line

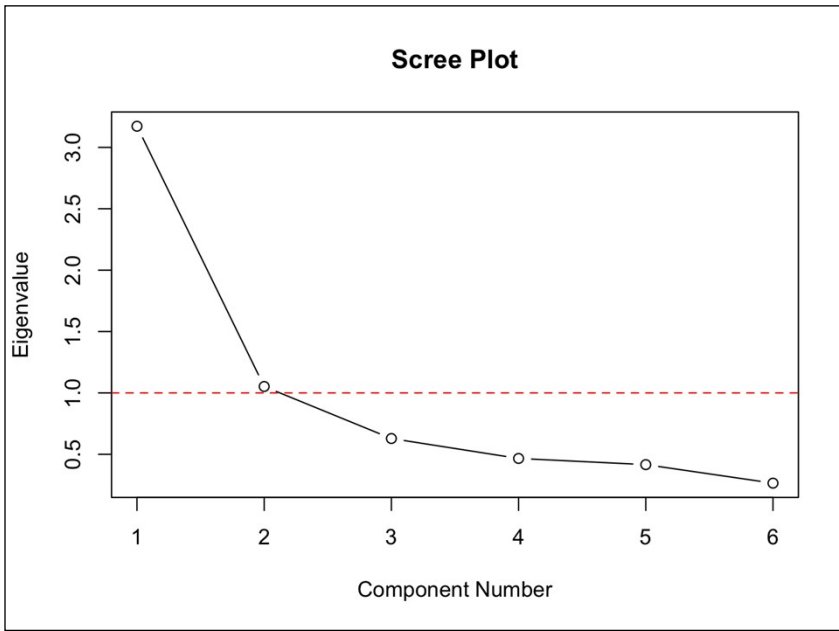

**Residuals for pr\_SB:**

|                        | <b>IS1</b>  | <b>IS2</b>  | <b>IS3</b>  | <b>IS4</b> |
|------------------------|-------------|-------------|-------------|------------|
| <b>numG1preIS1Fact</b> |             |             |             |            |
| <b>numG1preIS2Fact</b> | -0.03915441 |             |             |            |
| <b>numG1preIS3Fact</b> | 0.04479128  | -0.01870787 |             |            |
| <b>numG1preIS4Fact</b> | -0.01676051 | 0.06175765  | -0.03108526 |            |

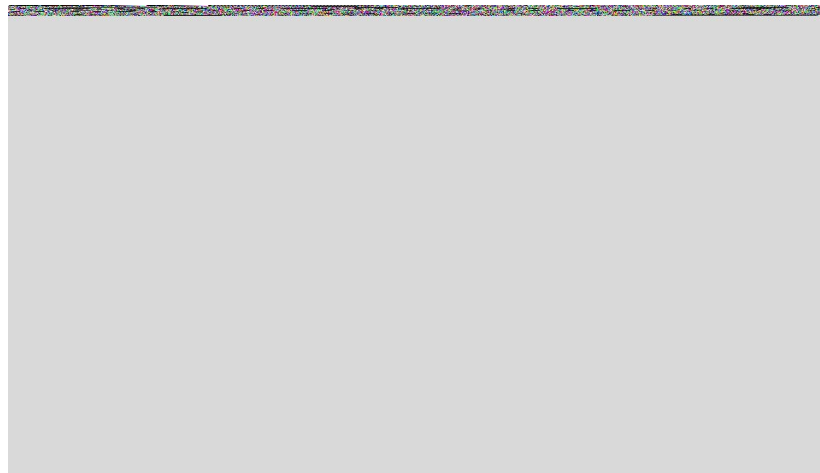

- 1 residual |0.05|
- Residuals are bimodal (not normally distributed)

**Note:** EFA was not conducted on SB as this instrument's internal structure has been confirmed in previous studies at the same institution (Edwards, *et al.*, 2021; Edwards, *et al.*, 2022; Edwards, *et al.*, 2023).

### **Multidimensional Confirmatory Factor Analysis of pr Social Belonging (pr SB and pr BU) Construct**

2 factors, 4 items one each factor

Estimator: MLM

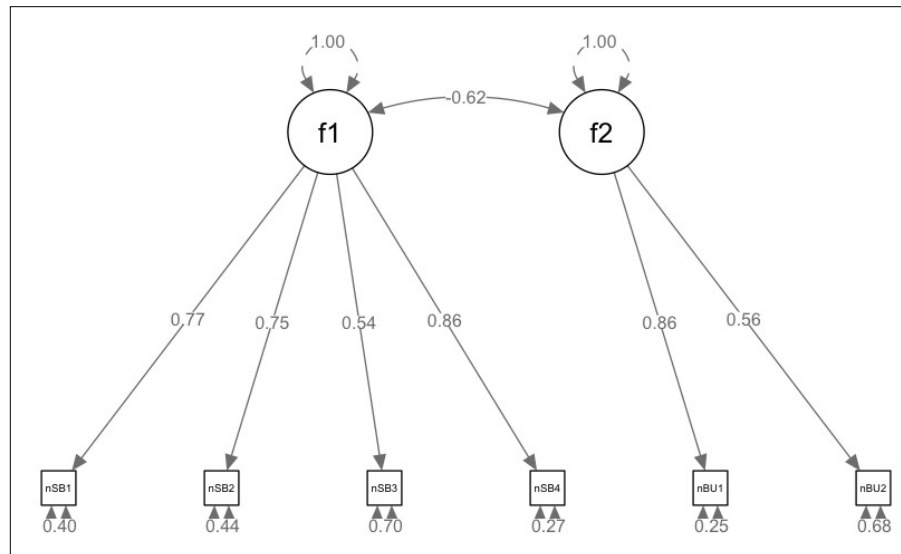

| N   | $\chi^2 (df, p)$  | RMSEA | CFI   | TLI   | SRMR  |
|-----|-------------------|-------|-------|-------|-------|
| 398 | 11.142 (8, 0.194) | 0.033 | 0.996 | 0.992 | 0.019 |

### **Unidimensional Confirmatory Factor Analysis of pr Belonging Uncertainty G2 Data**

2 items on one factor

Estimator: MLR

```

> G2prBU_CFA1 <- cfa(G2prBU_model, G2NumAllprSB, estimator= "mlr")
Warning message:
lavaan->lav_model_vcov():
  The variance-covariance matrix of the estimated parameters (vcov) does not appear to be positive
  definite! The smallest eigenvalue (= -2.272077e+03) is smaller than zero. This may be a symptom that the
  model is not identified. > summary(G2prBU_CFA1, fit.measures=TRUE, standardized=TRUE, rsquare=TRUE)
Error in if (!is.finite(X2)) || !is.finite(df) || !is.finite(X2.null) || :
  missing value where TRUE/FALSE needed
  
```

Note: Belonging uncertainty unidimensional model does not have an adequate internal structure to support 2 items on one factor.



## Unidimensional Confirmatory Factor Analysis of pr\_Sense of Belonging G2 Data

4 items on one factor

Estimator: MLR

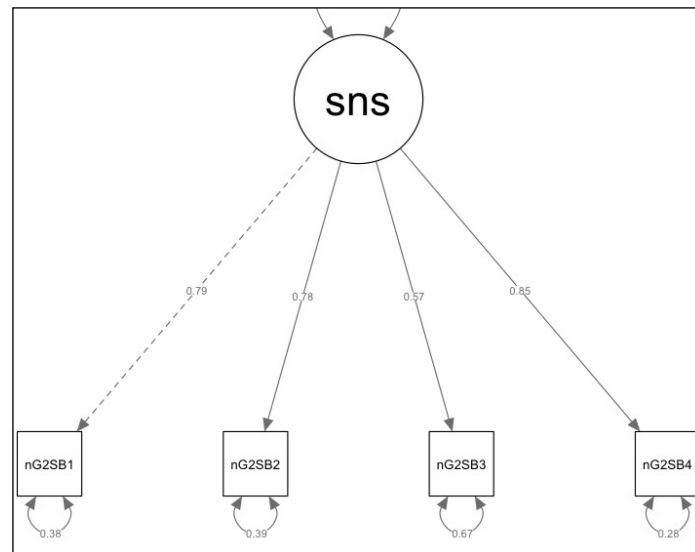

| N   | $\chi^2 (df, p)$ | RMSEA | CFI   | TLI   | SRMR  |
|-----|------------------|-------|-------|-------|-------|
| 199 | 1.538 (2, 0.464) | 0.0*  | 1.00* | 1.00* | 0.014 |

*\*To further support these fit indices, we provide additional “checkpoints” to support the use of this model. Please see modification indices, as well as residuals.*

### Modification Indices

```
> modindices(G2prSB_CFA1)
```

|    | lhs        | op | rhs        | mi    | epc    | sepc.lv | sepc.all | sepc.nox |
|----|------------|----|------------|-------|--------|---------|----------|----------|
| 10 | numG2prSB1 | ~~ | numG2prSB2 | 0.606 | 0.045  | 0.045   | 0.123    | 0.123    |
| 11 | numG2prSB1 | ~~ | numG2prSB3 | 1.804 | -0.062 | -0.062  | -0.126   | -0.126   |
| 12 | numG2prSB1 | ~~ | numG2prSB4 | 0.280 | 0.038  | 0.038   | 0.115    | 0.115    |
| 13 | numG2prSB2 | ~~ | numG2prSB3 | 0.280 | 0.021  | 0.021   | 0.049    | 0.049    |
| 14 | numG2prSB2 | ~~ | numG2prSB4 | 1.804 | -0.082 | -0.082  | -0.279   | -0.279   |
| 15 | numG2prSB3 | ~~ | numG2prSB4 | 0.606 | 0.034  | 0.034   | 0.086    | 0.086    |

Modification indices are not large enough to warrant kicking out any items: MI are not greater than 3.84 and expected parameter change (EPC) are not large enough to impact assessment (Gunzler and Morris, 2015).

## Residuals:

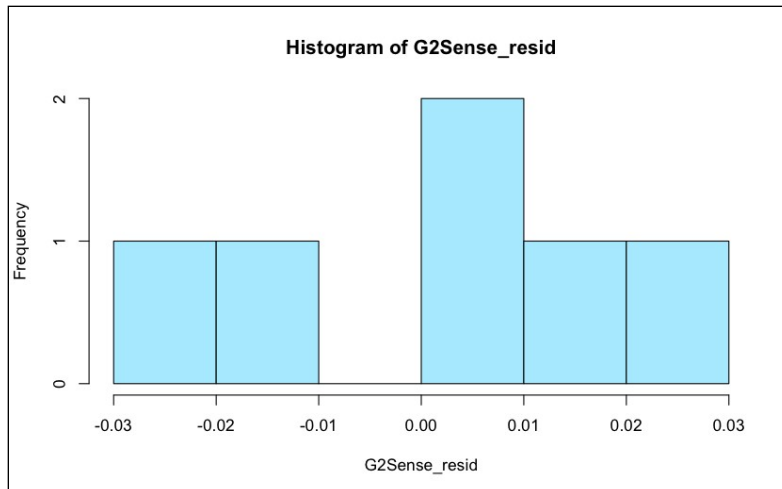

|            | numG2prSB1  | numG2prSB2   | numG2prSB3  | numG2prSB4 |
|------------|-------------|--------------|-------------|------------|
| numG2prSB1 |             |              |             |            |
| numG2prSB2 | 0.003830442 |              |             |            |
| numG2prSB3 | -0.02627202 | 0.02077674   |             |            |
| numG2prSB4 | 0.015308576 | -0.018549108 | 0.004695667 |            |

- No residual is over 0.05
- Bimodal distribution

## References

- Edwards J. D., Barthelemy R. S. and Frey R. F., (2021), Relationship between course-level social belonging (sense of belonging and belonging uncertainty) and academic performance in General Chemistry 1, *Journal of Chemical Education*, **99**, 71-82.
- Edwards J. D., Laguerre L., Barthelemy R. S., De Grandi C. and Frey R. F., (2022), Relating students' social belonging and course performance across multiple assessment types in a calculus-based introductory physics 1 course, *Physical Review Physics Education Research*, **18**, 020150.
- Edwards J. D., Torres H. L. and Frey R. F., (2023), The effect of social belonging on persistence to General Chemistry 2, *Journal of Chemical Education*.
- Gunzler D. D. and Morris N., (2015), A tutorial on structural equation modeling for analysis of overlapping symptoms in co-occurring conditions using MPlus, *Statistics in medicine*, **34**, 3246-3280.

## IV. Childhood Science Currency

From Turnbull's Self-Concept (20 total questions):

Prompt: Using a 6-point Likert-Scale where (1) "Strongly Disagree" (2) "Disagree" (3) "Somewhat Disagree" (4) "Somewhat Agree" (5) "Agree" (6) "Strongly Agree." rate your agreement to the following questions:

1. I find science difficult.
2. If I study hard, I will do well in my science courses.
3. I am just not good at science.

- |                                                                                                                                                                                                                                                                                                                                                     |                |
|-----------------------------------------------------------------------------------------------------------------------------------------------------------------------------------------------------------------------------------------------------------------------------------------------------------------------------------------------------|----------------|
| <ol style="list-style-type: none"><li>4. My parents/guardians think science is interesting.</li><li>5. My parents/guardians think it is important for me to learn science.</li><li>6. My parents/guardians would like it if I work in science.</li><li>7. My parents/guardians have explained to me that science is useful for my future.</li></ol> | <b>Parents</b> |
|-----------------------------------------------------------------------------------------------------------------------------------------------------------------------------------------------------------------------------------------------------------------------------------------------------------------------------------------------------|----------------|

8. My friends see me as a "science person".
9. My friends think that science is important.
10. My friends think that science is cool.
11. My friends care about their university grades.

- |                                                                                                                                                                                                                                                                                                                                                                                                                                                                    |                              |
|--------------------------------------------------------------------------------------------------------------------------------------------------------------------------------------------------------------------------------------------------------------------------------------------------------------------------------------------------------------------------------------------------------------------------------------------------------------------|------------------------------|
| <ol style="list-style-type: none"><li>12. Growing up, did you do science activities (e.g., science kits, nature walks, do experiments)?</li><li>13. Growing up, did you read books or magazines about science?</li><li>14. Growing up, did you look up things online about science or nature?</li><li>15. Growing up, did you watch TV programs about science or nature?</li><li>16. Growing up, did you go to a lunchtime or after-school science club?</li></ol> | <b>Science<br/>Resources</b> |
|--------------------------------------------------------------------------------------------------------------------------------------------------------------------------------------------------------------------------------------------------------------------------------------------------------------------------------------------------------------------------------------------------------------------------------------------------------------------|------------------------------|

17. I would like to study more science in the future.
18. I would like to have a job that uses science.
19. I would like to become a scientist.
20. I think I could be a good scientist one day.

\*Items 4-7 are *Parental Influence*, and items 12-15 are *Science Resources*. Together, these two factors make up *Childhood Science Currency*.

## Science Currency: Parental Influence Histograms

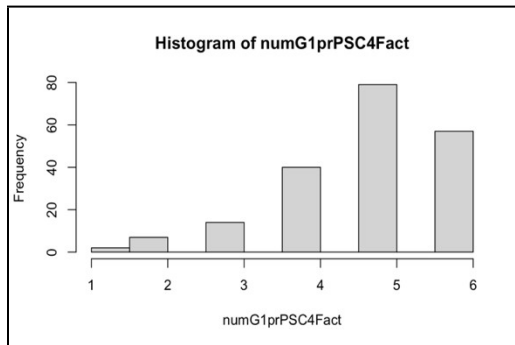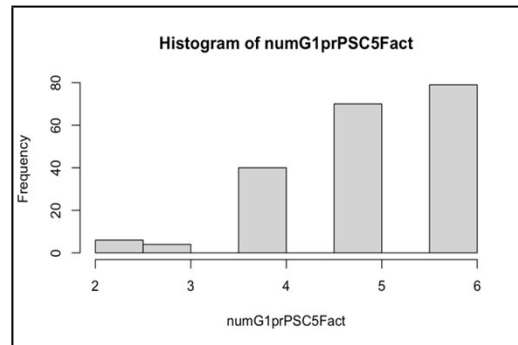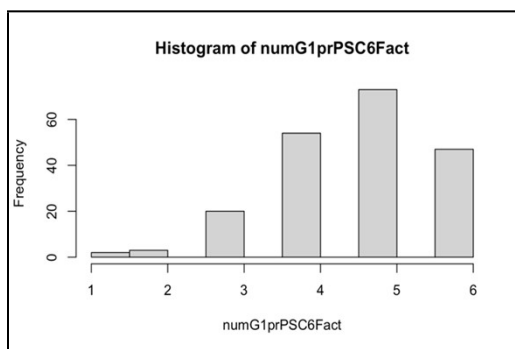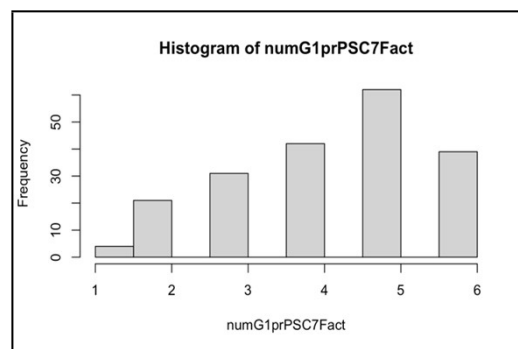

## Science Currency: Science Resources Histograms

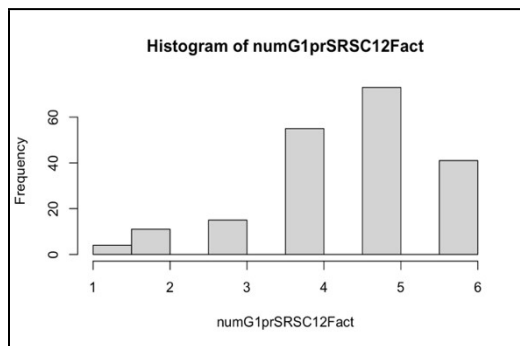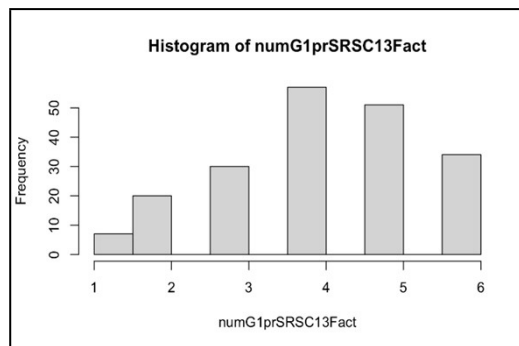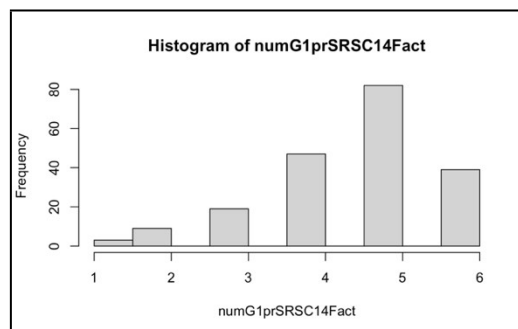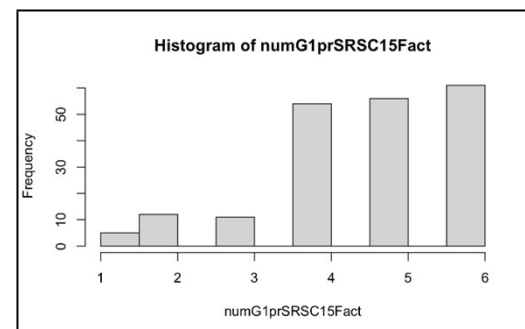

### G1-Skewness and Kurtosis for pr\_SciCur (4 items, outliers NOT removed)

|                  | Skewness   | Kurtosis | Mean     | SD        |
|------------------|------------|----------|----------|-----------|
| G1-item SciCur4  | -1.008289  | 3.898005 | 4.798995 | 1.100872  |
| G1-item SciCur5  | 1.04908    | 4.01551  | 5.065327 | 0.9748109 |
| G1-item SciCur6  | -0.6843867 | 3.450833 | 4.678392 | 1.052695  |
| G1-item SciCur7  | -0.4887209 | 2.334714 | 4.276382 | 1.336736  |
| G1-item SciCur12 | -0.8647786 | 3.555075 | 4.532663 | 1.179663  |
| G1-item SciCur13 | -0.4343093 | 2.489555 | 4.140704 | 1.341001  |
| G1-item SciCur14 | -0.8784902 | 3.586468 | 4.572864 | 1.134165  |
| G1-item SciCur15 | -0.9087916 | 3.392004 | 4.643216 | 1.274593  |

### Mardia's Test

```
> mardia(G1_AllprSciCur)
Call: mardia(x = G1_AllprSciCur)

Mardia tests of multivariate skew and kurtosis
Use describe(x) the to get univariate tests
n.obs = 199  num.vars = 8
b1p = 12.76  skew = 423.27 with probability <= 2e-35
small sample skew = 431.09 with probability <= 1.2e-36
b2p = 100.27  kurtosis = 11.3 with probability <= 0
```

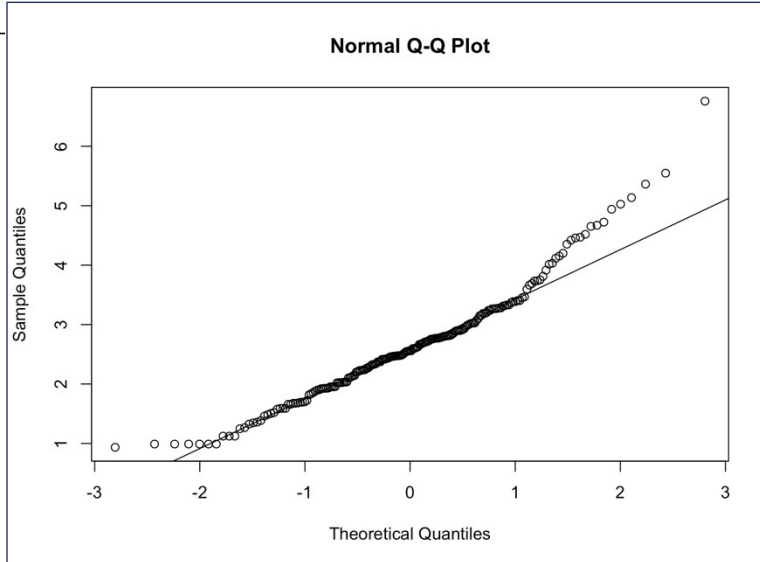

Mardia's test of multivariate skewness ( $b1p = 12.76$ ,  $p < .001$ ) and kurtosis ( $b2p = 100.27$ ,  $p < .001$ ; kurtosis = 11.3) indicated significant departures from multivariate normality for the 8 variables in the sample ( $n = 199$ ). These results suggest the data do not meet the assumption of multivariate normality.

## Polychoric Matrix

|        | Factor 1 |         |         |         | Factor 2 |         |         |         |
|--------|----------|---------|---------|---------|----------|---------|---------|---------|
|        | PSC4     | PSC5    | PSC6    | PSC7    | SRSC12   | SRSC13  | SRSC14  | SRSC15  |
| PSC4   | 1.00000  | 0.65706 | 0.36231 | 0.48754 | 0.24620  | 0.13899 | 0.17359 | 0.04222 |
| PSC5   | 0.65706  | 1.00000 | 0.55212 | 0.61009 | 0.23310  | 0.24020 | 0.13957 | 0.16519 |
| PSC6   | 0.36231  | 0.55212 | 1.00000 | 0.60544 | 0.13865  | 0.09304 | 0.12125 | 0.15872 |
| PSC7   | 0.48754  | 0.61009 | 0.60544 | 1.00000 | 0.24246  | 0.27685 | 0.17487 | 0.15895 |
| SRSC12 | 0.24620  | 0.23310 | 0.13865 | 0.24246 | 1.00000  | 0.60049 | 0.61257 | 0.46965 |
| SRSC13 | 0.13899  | 0.24020 | 0.09304 | 0.27685 | 0.60049  | 1.00000 | 0.66733 | 0.57321 |
| SRSC14 | 0.17359  | 0.13957 | 0.12125 | 0.17487 | 0.61257  | 0.66733 | 1.00000 | 0.62773 |
| SRSC15 | 0.04222  | 0.16519 | 0.15872 | 0.15895 | 0.46965  | 0.57321 | 0.62773 | 1.00000 |

## Kaiser-Myer Olkin Test (KMO)

```
Final Solution Achieved!> kmo_G1prSciCur[["results"]]
$overall
[1] 0.762362

$individual
      MSA
numG1prPSC4Fact 0.6853804
numG1prPSC5Fact 0.7228075
numG1prPSC6Fact 0.7192873
numG1prPSC7Fact 0.7899876
numG1prSRSC12Fact 0.8633140
numG1prSRSC13Fact 0.7684113
numG1prSRSC14Fact 0.7519852
numG1prSRSC15Fact 0.8070368
```

## Barlett's Test of Sphericity

```
> BartRes <- cortest.bartlett(G1AllprSciCurEXPoIMatrix, n=199)
> BartRes
$chisq
[1] 698.1981

$p.value
[1] 4.663306e-129

$df
[1] 28

> format(BartRes$p.value, scientific = TRUE)
[1] "4.663306e-129"
```

## Check for Multicollinearity Using VIFs

```
> vif(parent_model)
numG1prPSC4Fact numG1prPSC5Fact numG1prPSC6Fact numG1prPSC7Fact
      1.805451      2.370936      1.730965      1.957964

> vif(SciRes_model)
numG1prSRSC12Fact numG1prSRSC13Fact numG1prSRSC14Fact numG1prSRSC15Fact
      1.796271      2.135818      2.378865      1.781831
```

## Minimum Average Partial (MAP) test

Very Simple Structure

Call: `vss(x = G1_AllprSciCur, rotate = "varimax", fm = "minres", n.obs = nrow(G1_AllprSciCur))`

VSS complexity 1 achieves a maximum of 0.84 with 2 factors

VSS complexity 2 achieves a maximum of 0.91 with 3 factors

The Velicer MAP achieves a minimum of 0.06 with 2 factors

BIC achieves a minimum of -15.89 with 3 factors

Sample Size adjusted BIC achieves a minimum of -1.77 with 4 factors

Statistics by number of factors

|   | vss1 | vss2 | map   | dof | chisq   | prob    | sqresid | fit  | RMSEA | BIC   | SABIC | complex | eChisq  | SRMR    | eCRMS | eBIC  |
|---|------|------|-------|-----|---------|---------|---------|------|-------|-------|-------|---------|---------|---------|-------|-------|
| 1 | 0.66 | 0.00 | 0.149 | 20  | 3.5e+02 | 7.1e-62 | 5.79    | 0.66 | 0.287 | 243.1 | 306.5 | 1.0     | 4.6e+02 | 2.0e-01 | 0.241 | 355.4 |
| 2 | 0.84 | 0.90 | 0.064 | 13  | 5.5e+01 | 3.9e-07 | 1.63    | 0.90 | 0.127 | -13.7 | 27.5  | 1.1     | 2.1e+01 | 4.3e-02 | 0.063 | -48.0 |
| 3 | 0.76 | 0.91 | 0.101 | 7   | 2.1e+01 | 3.5e-03 | 1.09    | 0.94 | 0.101 | -15.9 | 6.3   | 1.2     | 5.3e+00 | 2.2e-02 | 0.044 | -31.8 |
| 4 | 0.76 | 0.90 | 0.160 | 2   | 2.5e+00 | 2.9e-01 | 0.89    | 0.95 | 0.034 | -8.1  | -1.8  | 1.3     | 6.9e-01 | 7.8e-03 | 0.029 | -9.9  |
| 5 | 0.72 | 0.90 | 0.262 | -2  | 7.1e-07 | NA      | 0.78    | 0.95 | NA    | NA    | NA    | 1.5     | 1.7e-07 | 3.9e-06 | NA    | NA    |
| 6 | 0.72 | 0.90 | 0.451 | -5  | 1.9e-09 | NA      | 0.72    | 0.96 | NA    | NA    | NA    | 1.5     | 3.8e-10 | 1.8e-07 | NA    | NA    |
| 7 | 0.72 | 0.90 | 1.000 | -7  | 6.5e-11 | NA      | 0.69    | 0.96 | NA    | NA    | NA    | 1.5     | 8.7e-12 | 2.8e-08 | NA    | NA    |
| 8 | 0.72 | 0.90 | NA    | -8  | 6.5e-11 | NA      | 0.69    | 0.96 | NA    | NA    | NA    | 1.5     | 8.7e-12 | 2.8e-08 | NA    | NA    |

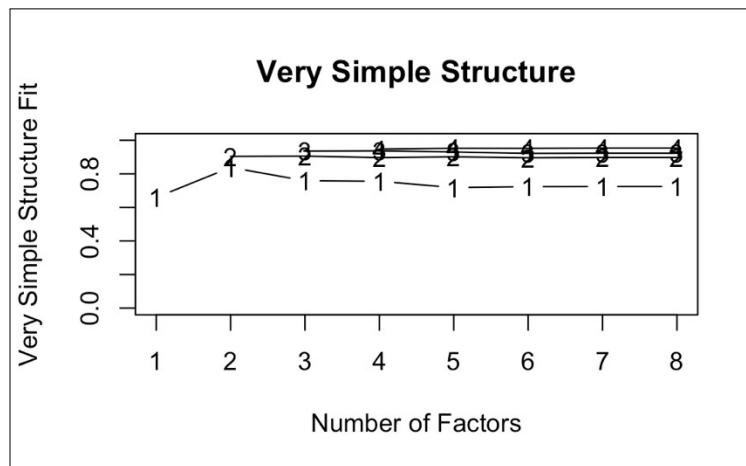

## Scree Plot—red line signifies the Kaiser criterion reference line

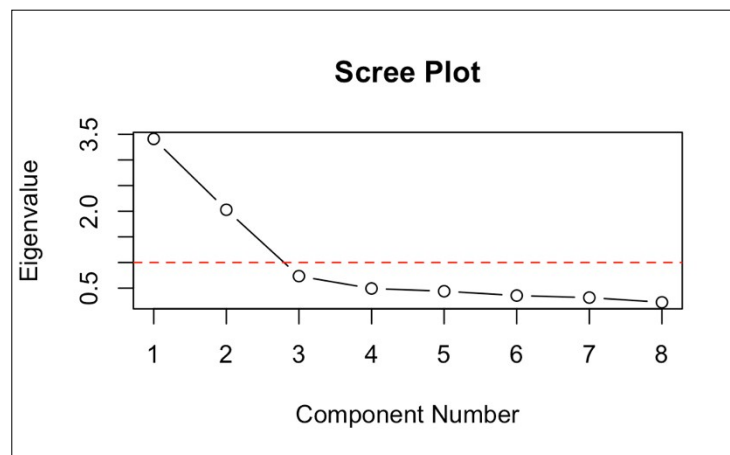

## Exploratory Factor Analysis

| Factor Loadings of Exploratory Factor Analysis (EFA) of Childhood Science Currency   |             |             |                  |                   |
|--------------------------------------------------------------------------------------|-------------|-------------|------------------|-------------------|
| Survey Item                                                                          | Factor 1    | Factor 2    | Uniqueness $u^2$ | Communality $h^2$ |
| PSC4                                                                                 | 0.00        | <b>0.67</b> | 0.55             | 0.45              |
| PSC5                                                                                 | -0.01       | <b>0.87</b> | 0.25             | 0.75              |
| PSC6                                                                                 | -0.03       | <b>0.67</b> | 0.56             | 0.44              |
| PSC7                                                                                 | 0.05        | <b>0.76</b> | 0.40             | 0.60              |
| SRS12                                                                                | <b>0.69</b> | 0.08        | 0.48             | 0.52              |
| SRS13                                                                                | <b>0.80</b> | 0.02        | 0.34             | 0.66              |
| SSC14                                                                                | <b>0.87</b> | -0.06       | 0.26             | 0.74              |
| SRS15                                                                                | <b>0.72</b> | -0.04       | 0.50             | 0.50              |
| $N = 199$ ; ; Factor loadings reported following a promax (oblique) factor rotation. |             |             |                  |                   |

## Residuals

|        | PSC4     | PSC5     | PSC6     | PSC7     | SRSC12   | SRSC13   | SRSC14   | SRSC15 |
|--------|----------|----------|----------|----------|----------|----------|----------|--------|
| PSC4   |          |          |          |          |          |          |          |        |
| PSC5   | 0.079928 |          |          |          |          |          |          |        |
| PSC6   | -0.07833 | -0.01746 |          |          |          |          |          |        |
| PSC7   | -0.02788 | -0.05584 | 0.098269 |          |          |          |          |        |
| SRSC12 | 0.055854 | -0.01058 | -0.03116 | -0.01131 |          |          |          |        |
| SRSC13 | -0.03022 | 0.024206 | -0.05296 | 0.041863 | 0.020782 |          |          |        |
| SRSC14 | 0.0427   | -0.02667 | 0.014866 | -0.01929 | 0.005692 | -0.02395 |          |        |
| SRSC15 | -0.07269 | 0.019075 | 0.063982 | -0.00897 | -0.03076 | 0.004027 | 0.023348 |        |

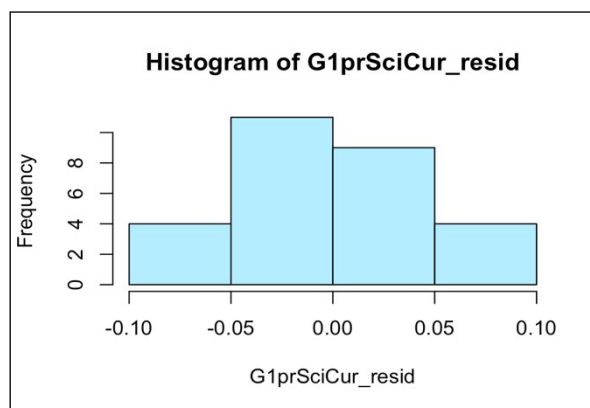

- 8 residuals over  $|0.05|$
- Residuals are normally distributed



## Multidimensional Confirmatory Factor Analysis on G2 Data

Two factors, 4 items per factor

Estimator: MLR

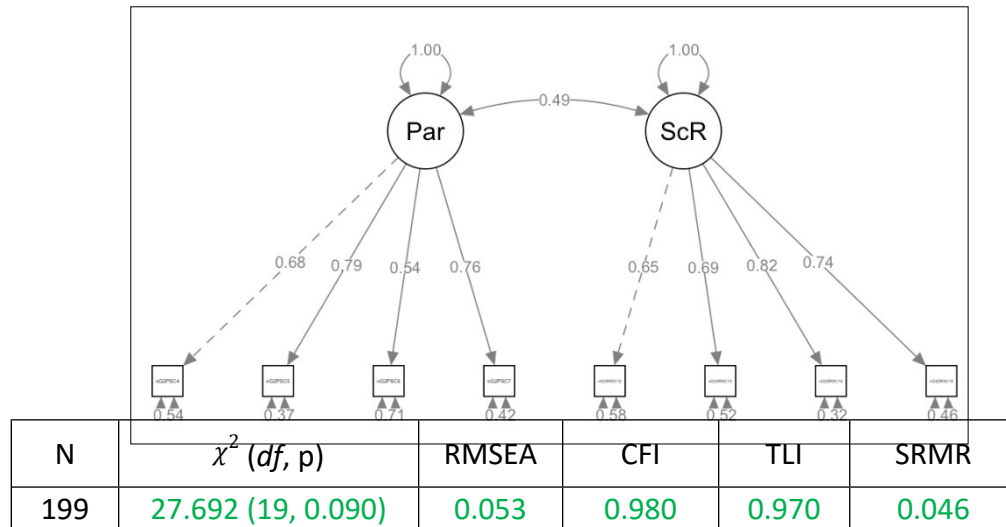

## Unidimensional Confirmatory Factor Analysis on G2 Data

One factor, 8 items on one factor

Estimator: MLR

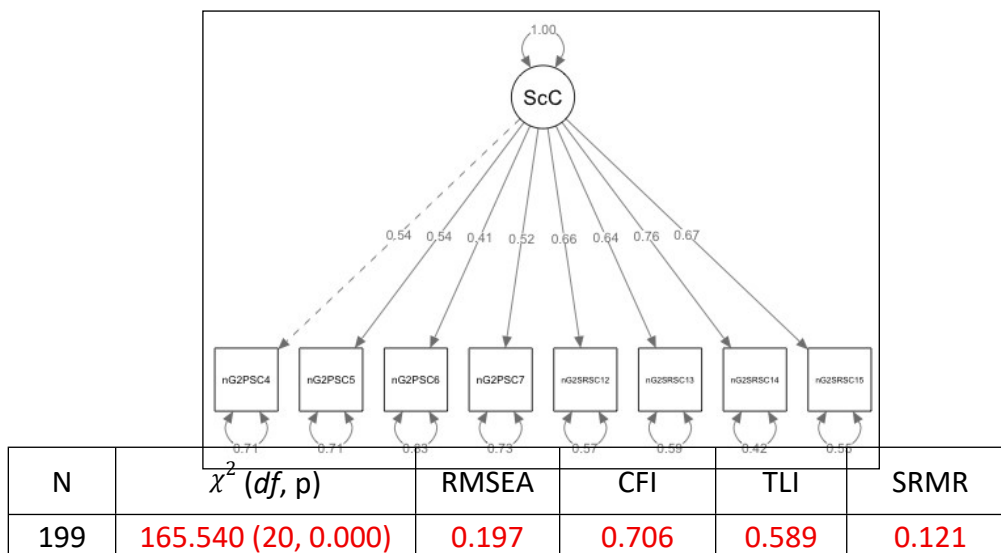

### Unidimensional Confirmatory Factor Analysis on G2 Data

One factor, 4 items (Parents) on one factor

Estimator: MLR

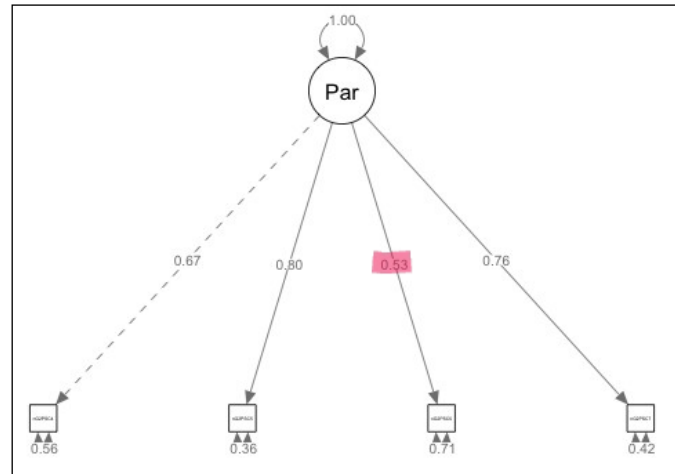

| N   | $\chi^2 (df, p)$ | RMSEA | CFI   | TLI   | SRMR  |
|-----|------------------|-------|-------|-------|-------|
| 199 | 5.409 (2, 0.067) | 0.115 | 0.977 | 0.930 | 0.037 |

### Unidimensional Confirmatory Factor Analysis on G2 Data

One factor, 4 items (Science Resources) on one factor

Estimator: MLR

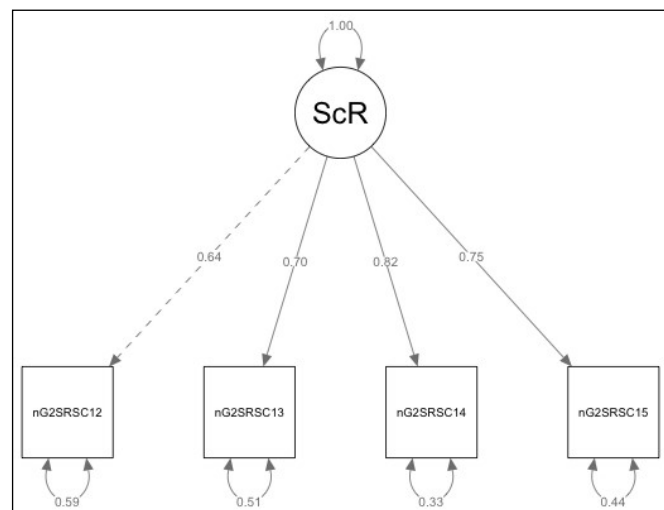

| N   | $\chi^2 (df, p)$ | RMSEA | CFI   | TLI   | SRMR  |
|-----|------------------|-------|-------|-------|-------|
| 199 | 2.883 (2, 0.237) | 0.055 | 0.995 | 0.986 | 0.022 |

## V. Removal of Outliers

Due to poor factor loadings ONLY in the Science Currency CFA (as seen above), outliers were removed from both G1 and G2 to improve loadings. Below are the Mahalanobis Distance and p-value for the outliers that were removed. As these outliers were removed in the CFA process, these outliers are reflected in the sample size used for the SEM path analysis ( $N = 354$ ).

| G1      |             |          |
|---------|-------------|----------|
| Outlier | Mahalanobis | P-value  |
| 1       | 21.64852    | 7.72E-05 |
| 2       | 19.98303    | 1.71E-04 |
| 3       | 30.77309    | 9.49E-07 |
| 4       | 24.40113    | 2.06E-05 |
| 5       | 28.75677    | 2.52E-06 |
| 6       | 16.94708    | 7.25E-04 |
| 7       | 19.54489    | 2.11E-04 |
| 8       | 17.2418     | 6.30E-04 |
| 9       | 18.94269    | 2.81E-04 |
| 10      | 17.63502    | 5.23E-04 |
| 11      | 21.81673    | 7.12E-05 |
| 12      | 26.37599    | 7.96E-06 |
| 13      | 25.2592     | 1.36E-05 |
| 14      | 22.31574    | 5.61E-05 |
| 15      | 45.68392    | 6.62E-10 |
| 16      | 19.86995    | 1.81E-04 |
| 17      | 20.41725    | 1.39E-04 |

| G2      |             |          |
|---------|-------------|----------|
| Outlier | Mahalanobis | P-value  |
| 1       | 16.4674     | 9.09E-04 |
| 2       | 18.17021    | 4.06E-04 |
| 3       | 17.75627    | 4.94E-04 |
| 4       | 33.02121    | 3.19E-07 |
| 5       | 26.48027    | 7.57E-06 |
| 6       | 16.46969    | 9.08E-04 |
| 7       | 25.13782    | 1.44E-05 |
| 8       | 16.74886    | 7.96E-04 |
| 9       | 20.28557    | 1.48E-04 |
| 10      | 25.85656    | 1.02E-05 |
| 11      | 18.129      | 4.14E-04 |
| 12      | 16.79003    | 7.81E-04 |
| 13      | 17.36623    | 5.94E-04 |
| 14      | 23.04049    | 3.96E-05 |
| 15      | 17.13085    | 6.64E-04 |
| 16      | 18.85624    | 2.93E-04 |
| 17      | 28.38584    | 3.01E-06 |
| 18      | 18.25816    | 3.89E-04 |
| 19      | 17.69778    | 5.08E-04 |
| 20      | 26.14141    | 8.91E-06 |
| 21      | 29.10906    | 2.12E-06 |

**Total outliers in childhood science currency = 38**

**$N = 398$  (original sample) – 38 (outliers) = 360**

*\* It was also found that 6 consenting students, who completed both surveys, had missing grades for either their midterm exams or their preassessments. In order to avoid Type I errors for future statistical analysis involving student performance, these seven students were also removed from future analysis. Thus, leaving us with a final sample of **354**, which is reflected in the SEM analysis portion.*

## B: SEM Path Models

Structural Equation Modeling (SEM) is a statistical technique used to explore relationships among observed (measured) and latent (unobserved) variables, whereby direct and indirect effects can be evaluated (Hancock and Mueller, 2013). Path Analysis, on the other hand, is a specialized form of multiple regression analysis that uses diagrams (path models) to visually represent hypothesized causal relationships among observed variables (Beaujean, 2014). Conveniently, path models adhere to common drawing conventions utilized in SEM models: ovals represent latent variables, squares represent observed variables, directional relations are indicated by straight, single-headed, and double-headed arrows represent covariance. Importantly, path analysis is not to be used to establish causality or to determine whether a specific model is correct (Streiner, 2005). Path analysis can only determine whether the data are consistent with the path model specified. When paired together, SEM path analysis provides a comprehensive approach for analyzing both simple and intricate relationships displayed in a given path model (Chavance, *et al.*, 2010).

Just as with factor analysis, assumption checks were conducted for these path models to determine suitability. These include ensuring correct model tracings, ample sample size, and a properly identified model. According to Wright's tracing rules, there can be a maximum of one double-headed arrow included in one path (covariance), there is no going forward and then backward (once you have traveled along a route forward, you cannot travel backward to get to the variable at the end point), and there can be no loops (non-recursive models) (Wright, 1918; Wright, 1934). Please see models presented in the main text or the example model below (**Example for Model 1a**) for models that follow Wright's Rules. To determine ample sample size, samples of 100 to 200 are generally considered the minimum necessary to obtain stable, unbiased estimates, while samples of fewer than 100 cases are often viewed as indefensible for most models (Kline, 2011). Others have indicated that at least 10 to 20 cases per free factor loadings (*q*; Equation 1) are needed to provide a minimal basis for unbiased estimation and inference (Bentler and Chou, 1987; Wolf, *et al.*, 2013). All SEM path models use the entire sample size ( $N = 354$ ), which satisfies the requirement provided by Kline. Additionally, we calculated the suggested sample size required by Bentler & Chou and Wolf et al. below.

### ***Determination of an Ample Sample Size***

Sample Size ( $N$ ) = 354

Free Factor Loadings ( $q$ ):

| Constructs              | Indicators | Factors | (Indicators – Factors) |
|-------------------------|------------|---------|------------------------|
| Imposter Syndrome       | 4          | 1       | 3                      |
| Academic Mindset Entity | 4          | 1       | 3                      |
| Sense of Belonging      | 4          | 1       | 3                      |
| Science Resources       | 4          | 1       | 3                      |

$$\text{Free Loadings } (q) = \Sigma(\text{indicators/latent variable} - \text{fixed loadings/latent variable}) \quad (1)$$
$$(q) = 12$$

$$\begin{aligned}\text{Minimum Recommended Sample Size} &= (\# \text{ of cases}) \times (q:\text{Free Factor Loadings}) \\ &= 10 \times 12 = 120\end{aligned}$$

$$\begin{aligned}\text{Upper/Conservative Recommended Range} &= (\# \text{ of cases}) \times (q:\text{Free Factor Loadings}) \\ &= 20 \times 12 = 240\end{aligned}$$

### **Model Identification**

Model identification should be considered to ensure that parameters are uniquely estimated. Simply put, the number of free factor loadings ( $q$ ; Equation 1) should be less than or equal to the number of non-redundant elements in the sample covariance matrix ( $p^*$ ). Where  $p^*$  is calculated using **Equation 2**, and  $p$  is the sum of manifest variables (items/observed variables) in the model.

$$p^* = \frac{p(p+1)}{2} \quad (2)$$

*Example calculation of  $p$  and  $p^*$ :*

|                                                                                                                                                                                                                                                                                                                                                                                                                                       |
|---------------------------------------------------------------------------------------------------------------------------------------------------------------------------------------------------------------------------------------------------------------------------------------------------------------------------------------------------------------------------------------------------------------------------------------|
| $p = 4$ items (sense of belonging)<br>$+ 4$ items (academic mindset entity)<br>$+ 4$ items (imposter syndrome)<br>$+ 4$ items (science resources)<br>$+ 1$ observed var. (preassessment)<br>$+ 1$ observed var. (exam variable: Exam 1 or Final Exam)<br><hr style="width: 50%; margin: 10px auto;"/> $p = 18$<br><br>$p^* = \frac{18(18+1)}{2} = 171$<br><br>$12 < 171, q < p^*$ Therefore, <b>this path model is overidentified</b> |
|---------------------------------------------------------------------------------------------------------------------------------------------------------------------------------------------------------------------------------------------------------------------------------------------------------------------------------------------------------------------------------------------------------------------------------------|

If  $q > p^*$  the model is underidentified (not enough information to estimate all parameters). If  $q = p^*$  the model is just-identified (a unique solution exists for each parameter, but the model cannot be tested for fit). If  $q < p^*$  the model is overidentified (the model can be tested for fit, and parameter estimates are possible in multiple ways). The total parameters ( $k$ ) can be found by summing the free factor loadings ( $q$ ) + observed variable residual variances (Count each observed variable's residual variance as one estimated parameter) + latent variable variances + latent variable covariance + endogenous latent variable residual variances (Count each observed variable's residual variance as one estimated parameter) + number of structural paths (Bentler

and Chou, 1987). It's also important to note that the number of parameters affects the degrees of freedom. A positive df is desirable because it indicates that your model is over-identified, meaning there is more information than unknowns, increasing the stability and reliability of the estimates. If df is zero, the model is just-identified, and if df is negative, the model is under-identified, meaning it's unlikely to produce stable or reliable results. The formula for this is provided in **Equation 3**.

$$df = \frac{p(p+1)}{2} - k \quad (3)$$

**Example calculation for df:**

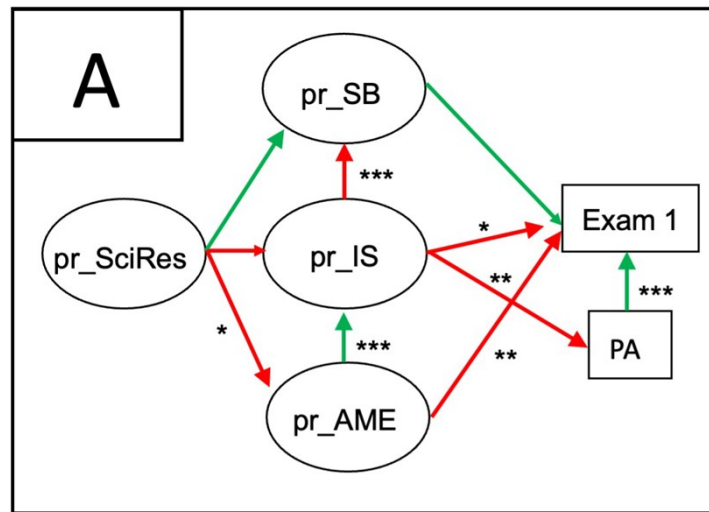

**Example for Model 1a**

*Degrees of Freedom*

*Total parameters (k) =*

*free factor loadings (q)*  
*+ observed variable residual variances*  
*+ latent variable variances + latent variable covariances + endogenous latent*  
*variable residual variances + number of structural paths*

*Total parameters (k) = 12 + 18 + 4 + 6 + 3 + 10 = 53*

$$df = \frac{p(p+1)}{2} - k = 171 - 53 = 118$$

|             |
|-------------|
| $q = 12$    |
| $p = 18$    |
| $p^* = 171$ |
| $k = 53$    |
| $df = 118$  |

## References

- Beaujean A. A., (2014), *Latent variable modeling using R: A step-by-step guide*, New York: Routledge.
- Bentler P. M. and Chou C.-P., (1987), Practical issues in structural modeling, *Sociological methods & research*, **16**, 78-117.
- Chavance M., Escolano S., Romon M., Basdevant A., de Lauzon-Guillain B. and Charles M. A., (2010), Latent variables and structural equation models for longitudinal relationships: an illustration in nutritional epidemiology, *BMC medical research methodology*, **10**, 1-10.
- Hancock G. R. and Mueller R. O., (2013), *Structural equation modeling: A second course*, Charlotte, North Carolina: lap.
- Kline R. B., (2011), in *The SAGE handbook of innovation in social research methods* SAGE Publications Ltd, pp. 562-589.
- Streiner D. L., (2005), Finding our way: an introduction to path analysis, *The Canadian Journal of Psychiatry*, **50**, 115-122.
- Wolf E. J., Harrington K. M., Clark S. L. and Miller M. W., (2013), Sample size requirements for structural equation models: An evaluation of power, bias, and solution propriety, *Educational and psychological measurement*, **73**, 913-934.
- Wright S., (1918), On the nature of size factors, *Genetics*, **3**, 367.
- Wright S., (1934), The method of path coefficients, *The annals of mathematical statistics*, **5**, 161-215.

# I. Main Text Model with FDR corrections and bootstrapped results

| Model A Fit (in main text) |                                |       |       |       |       |           |           |               |               |                    |                         |
|----------------------------|--------------------------------|-------|-------|-------|-------|-----------|-----------|---------------|---------------|--------------------|-------------------------|
|                            |                                | CFI   | TLI   | RMSEA | SRMR  | AIC       | BIC       | $\beta$       | $\beta^*$     | $p$ -value         | FDR Corr.<br>$p$ -value |
|                            | Model Fit                      | 0.988 | 0.986 | 0.030 | 0.045 | 13397.376 | 13568.851 |               |               |                    |                         |
| Path 1                     | pr_IS $\rightarrow$ pr_SB      |       |       |       |       |           |           | <b>-0.312</b> | <b>-0.412</b> | $2.580 * 10^{-10}$ | $4.270 * 10^{-10}$      |
| Path 2                     | pr_AME $\rightarrow$ pr_IS     |       |       |       |       |           |           | <b>0.558</b>  | <b>0.409</b>  | $1.327 * 10^{-12}$ | $2.655 * 10^{-12}$      |
| Path 3                     | pr_SciRes $\rightarrow$ pr_IS  |       |       |       |       |           |           | 0.041         | 0.030         | $6.473 * 10^{-1}$  | $7.225 * 10^{-1}$       |
| Path 4                     | pr_SciRes $\rightarrow$ pr_SB  |       |       |       |       |           |           | <b>0.133</b>  | <b>0.131</b>  | $5.262 * 10^{-2}$  | $6.014 * 10^{-2}$       |
| Path 5                     | pr_SciRes $\rightarrow$ pr_AME |       |       |       |       |           |           | <b>-0.159</b> | <b>-0.161</b> | $1.837 * 10^{-2}$  | $2.204 * 10^{-2}$       |
| Path 6                     | pr_IS $\rightarrow$ Exam1      |       |       |       |       |           |           | <b>-0.025</b> | <b>-0.148</b> | $2.029 * 10^{-2}$  | $2.375 * 10^{-2}$       |
| Path 7                     | pr_AME $\rightarrow$ Exam1     |       |       |       |       |           |           | <b>-0.040</b> | <b>-0.172</b> | $5.139 * 10^{-3}$  | $6.325 * 10^{-3}$       |
| Path 8                     | pr_SB $\rightarrow$ Exam1      |       |       |       |       |           |           | 0.003         | 0.014         | $8.092 * 10^{-1}$  | $8.828 * 10^{-1}$       |
| Path 9                     | PA_perc $\rightarrow$ Exam1    |       |       |       |       |           |           | <b>0.268</b>  | <b>0.304</b>  | $9.417 * 10^{-10}$ | $1.507 * 10^{-9}$       |
| Path 10                    | pr_IS $\rightarrow$ PA_perc    |       |       |       |       |           |           | <b>-0.032</b> | <b>-0.163</b> | $1.140 * 10^{-3}$  | $1.478 * 10^{-3}$       |

## Model A Bootstrapped Results

Estimator: ML

Test: Bollen.Stine

Iterations: 5000

Parameter Estimates: BCA.simple

\*Significant paths bolded

|         | Paths                          | S.E          | $\beta$       | ULCI          | LLCI          |
|---------|--------------------------------|--------------|---------------|---------------|---------------|
| Path 1  | pr_IS $\rightarrow$ pr_SB      | <b>0.050</b> | <b>-0.302</b> | <b>-0.418</b> | <b>-0.222</b> |
| Path 2  | pr_AME $\rightarrow$ pr_IS     | <b>0.081</b> | <b>0.558</b>  | <b>0.413</b>  | <b>0.737</b>  |
| Path 3  | pr_SciRes $\rightarrow$ pr_IS  | 0.089        | 0.041         | -0.140        | 0.215         |
| Path 4  | pr_SciRes $\rightarrow$ pr_SB  | 0.070        | 0.133         | 0.005         | 0.285         |
| Path 5  | pr_SciRes $\rightarrow$ pr_AME | <b>0.068</b> | <b>-0.159</b> | <b>-0.307</b> | <b>-0.037</b> |
| Path 6  | pr_IS $\rightarrow$ Exam1      | <b>0.011</b> | <b>-0.025</b> | <b>-0.048</b> | <b>-0.004</b> |
| Path 7  | pr_AME $\rightarrow$ Exam1     | <b>0.015</b> | <b>-0.040</b> | <b>-0.069</b> | <b>-0.012</b> |
| Path 8  | pr_SB $\rightarrow$ Exam1      | 0.014        | 0.003         | -0.024        | 0.033         |
| Path 9  | PA $\rightarrow$ Exam1         | <b>0.044</b> | <b>0.268</b>  | <b>0.179</b>  | <b>0.351</b>  |
| Path 10 | pr_IS $\rightarrow$ PA         | <b>0.010</b> | <b>-0.032</b> | <b>-0.051</b> | <b>-0.013</b> |



| Model B Fit (in main text) |                                  |       |       |       |       |           |           |               |               |                    |                         |
|----------------------------|----------------------------------|-------|-------|-------|-------|-----------|-----------|---------------|---------------|--------------------|-------------------------|
|                            |                                  | CFI   | TLI   | RMSEA | SRMR  | AIC       | BIC       | $\beta$       | $\beta^*$     | $p$ -value         | FDR Corr.<br>$p$ -value |
|                            | Model Fit                        | 0.990 | 0.988 | 0.027 | 0.045 | 13452.010 | 13623.485 |               |               |                    |                         |
| Path 1                     | pr_IS $\rightarrow$ pr_SB        |       |       |       |       |           |           | <b>-0.312</b> | <b>-0.412</b> | $2.629 * 10^{-10}$ | $4.206 * 10^{-10}$      |
| Path 2                     | pr_AME $\rightarrow$ pr_IS       |       |       |       |       |           |           | <b>0.558</b>  | <b>0.409</b>  | $1.358 * 10^{-12}$ | $2.716 * 10^{-12}$      |
| Path 3                     | pr_SciRes $\rightarrow$ pr_IS    |       |       |       |       |           |           | 0.040         | 0.030         | $6.561 * 10^{-1}$  | $7.324 * 10^{-1}$       |
| Path 4                     | pr_SciRes $\rightarrow$ pr_SB    |       |       |       |       |           |           | 0.133         | 0.131         | $5.260 * 10^{-2}$  | $6.011 * 10^{-2}$       |
| Path 5                     | pr_SciRes $\rightarrow$ pr_AME   |       |       |       |       |           |           | <b>-0.159</b> | <b>-0.161</b> | $1.819 * 10^{-2}$  | $2.144 * 10^{-2}$       |
| Path 6                     | pr_IS $\rightarrow$ Final Exam   |       |       |       |       |           |           | <b>-0.027</b> | <b>-0.028</b> | $1.832 * 10^{-2}$  | $2.144 * 10^{-2}$       |
| Path 7                     | pr_AME $\rightarrow$ Final Exam  |       |       |       |       |           |           | <b>-0.049</b> | <b>-0.038</b> | $7.209 * 10^{-3}$  | $8.873 * 10^{-3}$       |
| Path 8                     | pr_SB $\rightarrow$ Final Exam   |       |       |       |       |           |           | 0.005         | 0.004         | $7.251 * 10^{-1}$  | $7.910 * 10^{-1}$       |
| Path 9                     | PA_perc $\rightarrow$ Final Exam |       |       |       |       |           |           | <b>0.296</b>  | <b>0.296</b>  | $2.456 * 10^{-10}$ | $4.065 * 10^{-10}$      |
| Path 10                    | pr_IS $\rightarrow$ PA_perc      |       |       |       |       |           |           | <b>-0.032</b> | <b>-0.034</b> | $1.139 * 10^{-3}$  | $1.477 * 10^{-3}$       |

### Model B Bootstrapped Results

Estimator: ML

Test: Bollen.Stine

Iterations: 5000

Parameter Estimates: BCA.simple

\*Significant paths bolded

|         | Paths                           | S.E   | $\beta$       | ULCI          | LLCI          |
|---------|---------------------------------|-------|---------------|---------------|---------------|
| Path 1  | pr_IS $\rightarrow$ pr_SB       | 0.050 | <b>-0.312</b> | <b>-0.417</b> | <b>-0.220</b> |
| Path 2  | pr_AME $\rightarrow$ pr_IS      | 0.082 | <b>0.558</b>  | <b>0.404</b>  | <b>0.732</b>  |
| Path 3  | pr_SciRes $\rightarrow$ pr_IS   | 0.090 | -0.040        | -0.140        | 0.212         |
| Path 4  | pr_SciRes $\rightarrow$ pr_SB   | 0.070 | <b>0.133</b>  | <b>0.008</b>  | <b>0.282</b>  |
| Path 5  | pr_SciRes $\rightarrow$ pr_AME  | 0.069 | <b>-0.159</b> | <b>-0.311</b> | <b>-0.042</b> |
| Path 6  | pr_IS $\rightarrow$ Final Exam  | 0.011 | <b>-0.027</b> | <b>-0.049</b> | <b>-0.004</b> |
| Path 7  | pr_AME $\rightarrow$ Final Exam | 0.018 | <b>-0.049</b> | <b>-0.083</b> | <b>-0.013</b> |
| Path 8  | pr_SB $\rightarrow$ Final Exam  | 0.015 | -0.005        | -0.033        | 0.026         |
| Path 9  | PA $\rightarrow$ Final Exam     | 0.047 | <b>0.296</b>  | <b>0.202</b>  | <b>0.386</b>  |
| Path 10 | pr_IS $\rightarrow$ PA          | 0.010 | <b>-0.032</b> | <b>-0.052</b> | <b>-0.012</b> |

## II. Additional Models tested (not included in the main text)

| Switched Path, pr_IS → pr_AME |                       |       |       |       |       |           |           |         |                     |
|-------------------------------|-----------------------|-------|-------|-------|-------|-----------|-----------|---------|---------------------|
|                               |                       | CFI   | TLI   | RMSEA | SRMR  | AIC       | BIC       | $\beta$ | FDR $p$ -value      |
|                               | Model Fit             | 0.990 | 0.988 | 0.029 | 0.045 | 13675.221 | 13838.902 |         |                     |
| Path 1                        | pr_IS → pr_SB         |       |       |       |       |           |           | -0.310  | $6.349 * 10^{-10}$  |
| Path 2                        | <b>pr_IS → pr_AME</b> |       |       |       |       |           |           | 0.292   | $1.410 * 10^{-9}$   |
| Path 3                        | pr_SciRes → pr_SB     |       |       |       |       |           |           | 0.125   | $8.478 * 10^{-2}$   |
| Path 4                        | pr_SciRes → pr_AME    |       |       |       |       |           |           | -0.147  | $1.840 * 10^{-2}$   |
| Path 5                        | pr_SciRes → pr_IS     |       |       |       |       |           |           | -0.051  | $6.833 * 10^{-1}$   |
| Path 6                        | pr_IS → PA            |       |       |       |       |           |           | -0.032  | $1.552 * 10^{-3}$   |
| Switch Path, pr_AME → pr_IS   |                       |       |       |       |       |           |           |         |                     |
|                               |                       | CFI   | TLI   | RMSEA | SRMR  | AIC       | BIC       | $\beta$ | FDR $p$ -value      |
|                               | Model Fit             | 0.990 | 0.988 | 0.029 | 0.046 | 13672.442 | 13828.328 |         |                     |
| Path 1                        | pr_IS → pr_SB         |       |       |       |       |           |           | -0.313  | $4.419 * 10^{-10}$  |
| Path 2                        | <b>pr_AME → pr_IS</b> |       |       |       |       |           |           | 0.557   | $2.659 * 10^{-12}$  |
| Path 3                        | pr_SciRes → pr_SB     |       |       |       |       |           |           | 0.126   | $7.742 * 10^{-2}$   |
| Path 4                        | pr_SciRes → pr_AME    |       |       |       |       |           |           | -0.159  | $2.138 * 10^{-2}$   |
| Path 5                        | pr_SciRes → pr_IS     |       |       |       |       |           |           | 0.038   | $7.342 * 10^{-1}$   |
| Path 6                        | pr_IS → PA            |       |       |       |       |           |           | -0.032  | $1.651 * 10^{-3}$   |
| Switch Path, pr_SB → pr_IS    |                       |       |       |       |       |           |           |         |                     |
|                               |                       | CFI   | TLI   | RMSEA | SRMR  | AIC       | BIC       | $\beta$ | FDR $p$ -value      |
|                               | Model Fit             | 0.987 | 0.984 | 0.034 | 0.068 | 13684.121 | 13836.110 |         |                     |
| Path 1                        | <b>pr_SB → pr_IS</b>  |       |       |       |       |           |           | -0.457  | $1.107 * 10^{-6}$   |
| Path 2                        | pr_AME → pr_IS        |       |       |       |       |           |           | 0.466   | $1.0812 * 10^{-10}$ |
| Path 3                        | pr_SciRes → pr_SB     |       |       |       |       |           |           | 0.152   | $6.893 * 10^{-2}$   |
| Path 4                        | pr_SciRes → pr_AME    |       |       |       |       |           |           | -0.163  | $1.809 * 10^{-2}$   |
| Path 5                        | pr_SciRes → pr_IS     |       |       |       |       |           |           | 0.090   | $2.754 * 10^{-1}$   |
| Path 6                        | pr_IS → PA            |       |       |       |       |           |           | -0.032  | $2.347 * 10^{-3}$   |

\*Though AIC does not have a meaningful scale, the model with the smallest AIC value is the most likely to replicate and helpful for model selection (Klin, 2023)

| <i>pr SB → Exam 1, pr AME → Exam 1</i> |                 |       |       |       |       |          |          |               |                    |
|----------------------------------------|-----------------|-------|-------|-------|-------|----------|----------|---------------|--------------------|
|                                        |                 | CFI   | TLI   | RMSEA | SRMR  | AIC      | BIC      | Estimate      | <i>p-value</i>     |
|                                        | Model Fit       | 0.989 | 0.983 | 0.055 | 0.044 | 3722.608 | 3734.926 |               |                    |
| Path 1                                 | pr_SB → pr_AME  |       |       |       |       |          |          | <b>-0.175</b> | $3.615 * 10^{-3}$  |
| Path 2                                 | pr_AME → Exam 1 |       |       |       |       |          |          | <b>-0.050</b> | $9.211 * 10^{-5}$  |
| Path 3                                 | pr_SB → Exam 1  |       |       |       |       |          |          | 0.017         | $1.131 * 10^{-1}$  |
| Path 4                                 | PA → Exam 1     |       |       |       |       |          |          | <b>0.275</b>  | $1.316 * 10^{-10}$ |

| <i>pr SB → Final Exam, pr AME → Final Exam</i> |                   |       |       |       |       |          |          |               |                    |
|------------------------------------------------|-------------------|-------|-------|-------|-------|----------|----------|---------------|--------------------|
|                                                |                   | CFI   | TLI   | RMSEA | SRMR  | AIC      | BIC      | Estimate      | <i>p-value</i>     |
|                                                | Model Fit         | 0.991 | 0.987 | 0.049 | 0.044 | 3778.045 | 3844.296 |               |                    |
| Path 1                                         | pr_SB → pr_AME    |       |       |       |       |          |          | <b>-0.186</b> | $2.426 * 10^{-3}$  |
| Path 2                                         | pr_AME → Final Ex |       |       |       |       |          |          | <b>-0.059</b> | $2.254 * 10^{-4}$  |
| Path 3                                         | pr_SB → Final Ex  |       |       |       |       |          |          | 0.011         | $2.947 * 10^{-1}$  |
| Path 4                                         | PA → Final Ex     |       |       |       |       |          |          | <b>0.305</b>  | $7.773 * 10^{-12}$ |

### C. Mediation Analysis

Mediation analysis, or more commonly thought of as models with direct and indirect effects, are commonly used in the behavioral sciences (Mayer, *et al.*, 2014). Mediation analysis is useful whenever researchers assume that the effects of a presumed cause on an outcome of interest might be transmitted through one or more intermediate variables. However, many SEM parameters, particularly indirect effects, do not follow a normal distribution and are often skewed or kurtotic, violating the assumptions of standard statistical inference. Traditional methods for calculating standard errors and confidence intervals (like the delta method or Sobel test) rely on normality assumptions, which can lead to inaccurate or misleading results for non-normally distributed estimates. Additionally, due to the complex nature of SEM models: often involving multiple mediators, latent variables, and non-linear relationships, analytical formulas for standard errors and confidence intervals can become intractable or unavailable for such models. Therefore, bootstrapping is

In this study, we used the *manymome* package, an RStudio package developed by Cheung and Cheung (2024), which can be used to estimate and calculate confidence intervals (C.I) for indirect, direct, and total effects. This is done using a two-step approach where model parameters are estimated by SEM using *lavaan*, and then the coefficients are used to compute the requested effects and form confidence intervals (Cheung and Cheung, 2024).

Traditionally, there are two approaches to mediation analysis: the difference method and the product method. Below, I will briefly describe the method used in the *manymome* package—the product method, using a mathematical breakdown. Consider the following equations (**equations 4-6**). In these equations,  $Y_0$  is the dependent variable,  $X$  is the independent variable,  $X_M$  is the mediating variable,  $\tau'$  codes the relation between the independent variable, and the dependent variable,  $\alpha$  codes the relation between the independent variable and the dependent variable adjusted for the effects of the mediating variable,  $\beta$  codes the relation between the independent variable and the mediating variable, and  $\gamma$  codes the relation between the mediating variable and the dependent variable adjusted for the independent variable. The residuals are coded by  $\varepsilon_1$ ,  $\varepsilon_2$ , and  $\varepsilon_3$  and have expected values of zero. The intercepts are coded by  $\beta_{01}$ ,  $\beta_{02}$ , and  $\beta_{03}$ . In the first regression equation, the dependent variable ( $Y_0$ ) is regressed on only the independent variable ( $X$ ). In the second regression equation, the dependent variable ( $Y_0$ ) is regressed on both the independent variable ( $X$ ) and the mediating variable ( $X_M$ ). The indirect effect equals the difference in the estimated independent variable coefficients in the two regression equations (Judd & Kenny, 1981)

$$Y_0 = \beta_{01} + \tau'X + \varepsilon_1 \quad (4)$$

$$Y_0 = \beta_{02} + \tau'X + \beta X_M + \varepsilon_2 \quad (5)$$

$$X_M = \beta_{03} + \alpha X + \beta X_M + \varepsilon_3 \quad (6)$$

Total effects consist of all paths from one variables to another mediated by at least one additional variable (Bollen, 1987). In other words, total effects are equal to the sum of the direct and indirect path effects (MacKinnon, *et al.*, 2004) as shown in **Figure 1** and **Equation 7-8**.

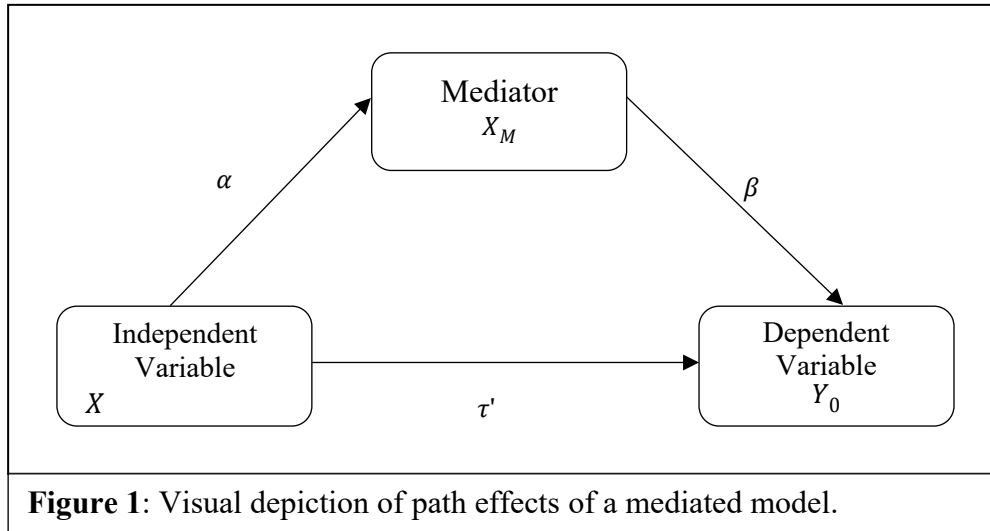

$$\text{Direct Effect} = \tau' \quad (7)$$

$$\text{Indirect Effect} = \alpha\beta \quad (8)$$

$$\text{Total Effects} = \alpha\beta + \tau' \quad (9)$$

*Calculation of indirect and total effects*

Path of interest: **pr\_AME** → **pr\_IS** → **pr\_SB**

| Pathway                                              | Estimate      | Boot S.E     | Boot LLCI     | Boot ULCI     |
|------------------------------------------------------|---------------|--------------|---------------|---------------|
| Direct<br>pr_AME --> pr_SB                           | -0.060        | 0.063        | -0.193        | 0.070         |
| <b>Indirect<br/>pr_AME --&gt; pr_IS --&gt; pr_SB</b> | <b>-0.146</b> | <b>0.039</b> | <b>-0.231</b> | <b>-0.080</b> |
| <b>Total Effects</b>                                 | <b>-0.205</b> | <b>0.065</b> | <b>-0.341</b> | <b>-0.087</b> |

Path of interest: **pr\_SciRes** → **pr\_AME** → **pr\_IS**

| Pathway                                                  | Estimate     | Boot S.E     | Boot LLCI     | Boot ULCI     |
|----------------------------------------------------------|--------------|--------------|---------------|---------------|
| Direct<br>pr_SciRes --> pr_IS                            | 0.037        | 0.354        | -0.143        | 0.218         |
| <b>Indirect<br/>pr_SciRes --&gt; pr_AME --&gt; pr_IS</b> | <b>-0.88</b> | <b>0.156</b> | <b>-0.179</b> | <b>-0.020</b> |
| Total Effects                                            | -0.051       | 0.394        | -0.257        | 0.145         |

Path of interest: **pr\_SciRes** → **pr\_AME** → **Exam 1**

| Pathway                                                 | Estimate     | Boot S.E     | Boot LLCI    | Boot ULCI    |
|---------------------------------------------------------|--------------|--------------|--------------|--------------|
| Direct<br>pr_SciRes --> Exam1                           | -0.021       | 0.049        | -0.046       | 0.004        |
| <b>Indirect<br/>pr_SciRes --&gt; pr_AME--&gt; Exam1</b> | <b>0.007</b> | <b>0.016</b> | <b>0.001</b> | <b>0.017</b> |
| Total Effects                                           | -0.014       | 0.050        | -0.040       | 0.011        |

Path of interest: **pr\_AME** → **pr\_IS** → **Exam1**

| Pathway                              | Estimate | Boot S.E | Boot LLCI | Boot ULCI |
|--------------------------------------|----------|----------|-----------|-----------|
| Direct<br><b>pr_AME --&gt; Exam1</b> | -0.040   | 0.015    | -0.068    | -0.011    |
| Indirect                             | -0.013   | 0.006    | -0.025    | -0.002    |

|                                        |        |       |        |        |
|----------------------------------------|--------|-------|--------|--------|
| <b>pr_AME --&gt; pr_IS--&gt; Exam1</b> |        |       |        |        |
| Total Effects                          | -0.053 | 0.012 | -0.078 | -0.028 |

Path of interest: **pr\_IS → PA → Exam1**

| Pathway                                        | Estimate | Boot S.E | Boot LLCI | Boot ULCI |
|------------------------------------------------|----------|----------|-----------|-----------|
| Direct<br><b>pr_IS --&gt; Exam1</b>            | -0.025   | 0.011    | -0.046    | -0.003    |
| Indirect<br><b>pr_IS--&gt; PA --&gt; Exam1</b> | -0.009   | 0.003    | -0.015    | -0.003    |
| Total Effects                                  | -0.033   | 0.011    | -0.055    | -0.011    |

Path of interest: **pr\_SciRes → pr\_AME → Final Exam**

| Pathway                                                     | Estimate | Boot S.E | Boot LLCI | Boot ULCI |
|-------------------------------------------------------------|----------|----------|-----------|-----------|
| Direct<br><b>pr_SciRes --&gt; Final Exam</b>                | 0.009    | 0.009    | -0.008    | 0.027     |
| Indirect<br><b>pr_SciRes --&gt; pr_AME--&gt; Final Exam</b> | 0.005    | 0.002    | 0.000     | 0.011     |
| Total Effects                                               | 0.014    | 0.009    | -0.004    | 0.033     |

Path of interest: **pr\_AME → pr\_IS → Final Exam**

| Pathway                                                 | Estimate | Boot S.E | Boot LLCI | Boot ULCI |
|---------------------------------------------------------|----------|----------|-----------|-----------|
| Direct<br><b>pr_AME --&gt; Final Exam</b>               | -0.014   | 0.006    | -0.027    | -0.002    |
| Indirect<br><b>pr_AME --&gt; pr_IS--&gt; Final Exam</b> | -0.048   | 0.019    | -0.083    | -0.010    |
| Total Effects                                           | -0.062   | 0.016    | -0.093    | -0.029    |

Path of interest: **pr\_IS → PA → Final Exam**

| Pathway                                  | Estimate | Boot S.E | Boot LLCI | Boot ULCI |
|------------------------------------------|----------|----------|-----------|-----------|
| Direct<br><b>pr_IS --&gt; Final Exam</b> | -0.009   | 0.003    | -0.016    | -0.003    |
| Indirect                                 | -0.036   | 0.011    | -0.048    | -0.004    |

|                                         |        |       |        |        |
|-----------------------------------------|--------|-------|--------|--------|
| <b>pr_IS--&gt; PA --&gt; Final Exam</b> |        |       |        |        |
| Total Effects                           | -0.036 | 0.011 | -0.058 | -0.013 |

## References

- Bollen K. A., (1987), Total, direct, and indirect effects in structural equation models, *Sociological methodology*, 37-69.
- Cheung S. F. and Cheung S.-H., (2024), manyome: An R package for computing the indirect effects, conditional effects, and conditional indirect effects, standardized or unstandardized, and their bootstrap confidence intervals, in many (though not all) models, *Behavior Research Methods*, **56**, 4862-4882.
- MacKinnon D. P., Lockwood C. M. and Williams J., (2004), Confidence limits for the indirect effect: Distribution of the product and resampling methods, *Multivariate behavioral research*, **39**, 99-128.
- Mayer A., Thoemmes F., Rose N., Steyer R. and West S. G., (2014), Theory and analysis of total, direct, and indirect causal effects, *Multivariate Behavioral Research*, **49**, 425-442.
